# Supplementary material
Source: publisher figshare collection journal article supplement (https://tandf.figshare.com/articles/dataset/_/7218281)
Supplement: Supplementary file 1 [file 1]

**Supplemental table A. Databases and search terms.**

| Database                    | Search Terms                                                                                                                                                                                                                                                                                   |
|-----------------------------|------------------------------------------------------------------------------------------------------------------------------------------------------------------------------------------------------------------------------------------------------------------------------------------------|
| PubMed                      | ("cognitive load" OR "cognitive load theory" OR “mental effort” OR “mental load” OR “human channel capacity” OR “mental workload”) AND (“education, professional” OR “professional education” OR education [sh] OR educat* OR training OR trainee* OR students [mesh] OR student* OR learner*) |
| PsycINFO                    | ("cognitive load" OR "cognitive load theory" OR “mental effort” OR “mental load” OR “human channel capacity” OR “mental workload”) AND (educat* OR education OR training OR trainee* OR student* OR learner*) in ANYWHERE                                                                      |
| ERIC                        | ("cognitive load" OR "cognitive load theory" OR “mental effort” OR “mental load” OR “human channel capacity” OR “mental workload”) AND (educat* OR education OR training OR trainee* OR student* OR learner*) in ANYWHERE                                                                      |
| CINAHL                      | ("cognitive load" OR "cognitive load theory" OR “mental effort” OR “mental load” OR “human channel capacity” OR “mental workload”) AND (educat* OR education OR training OR trainee* OR student* OR learner*)                                                                                  |
| Scopus                      | ("cognitive load" OR "cognitive load theory" OR “mental effort” OR “mental load” OR “human channel capacity” OR “mental workload”) AND (educat* OR education OR training OR trainee* OR student* OR learner*) in Article, Title, Abstract, Keywords                                            |
| Web of Science              | ("cognitive load" OR "cognitive load theory" OR “mental effort” OR “mental load” OR “human channel capacity” OR “mental workload”) AND (educat* OR education OR training OR trainee* OR student* OR learner*) in TOPIC                                                                         |
| IEEE Xplore Digital Library | ("cognitive load" OR "cognitive load theory" OR “mental effort” OR “mental load” OR “human channel capacity” OR “mental workload”) AND (educat* OR education OR training OR trainee* OR student* OR learner*)                                                                                  |
| Google Scholar              | allintitle: ("cognitive load" OR "cognitive load theory" OR "mental effort" OR "mental load" OR "human channel capacity" OR "mental workload") AND (education OR training OR trainee)                                                                                                          |
