# Supplementary material
Source: publisher figshare collection journal article supplement (https://tandf.figshare.com/articles/dataset/_/7218281)
Supplement: Supplementary file 2 [file 1]

Archive with 4 entries (4 files):
- imte_a_1505034_sm8395.docx
- imte_a_1505034_sm0784.pdf
- imte_a_1505034_sm0703.pdf
- imte_a_1505034_sm0527.pdf
