# Supplementary material
Source: publisher figshare collection journal article supplement (https://tandf.figshare.com/articles/dataset/_/7218281)
Supplement: Supplementary file 2 [file 1 › imte_a_1505034_sm0784.pdf]

**Supplemental table B. Included studies.**

| Author and year            | Location(s)   | Study methodology              | Participants <sup>a</sup>                                                          | Activity, Simulation or Workplace             | Data sources                                          | CL measurement technique(s) <sup>b</sup>     | CLT-related study aim(s) <sup>b</sup>                                                                                                                                                    | Major finding(s) related to CLT <sup>b</sup>                                                                                                                    |
|----------------------------|---------------|--------------------------------|------------------------------------------------------------------------------------|-----------------------------------------------|-------------------------------------------------------|----------------------------------------------|------------------------------------------------------------------------------------------------------------------------------------------------------------------------------------------|-----------------------------------------------------------------------------------------------------------------------------------------------------------------|
| Andersen 2015 <sup>1</sup> | Denmark       | Quantitative, experimental     | 40 “novice” medical students                                                       | Mastoidectomy surgery, Simulation             | Objective observations or tests                       | Visual secondary task                        | To compare CL during virtual reality simulated mastoidectomy training using distributed versus massed practice                                                                           | Reaction time was lower among those learning mastoidectomy using a distributed versus massed practice approach                                                  |
| Andersen 2016 <sup>2</sup> | Denmark       | Quantitative, experimental     | 40 otorhinolaryngology residents                                                   | Mastoidectomy surgery, Simulation             | Objective observations or tests                       | Visual secondary task                        | To compare CL during mastoidectomy training using in traditional dissection versus virtual reality simulation                                                                            | Reaction time higher in cadaveric than in simulated mastoidectomy                                                                                               |
| Andersen 2016 <sup>3</sup> | Denmark       | Quantitative, experimental     | 36 medical students                                                                | Mastoidectomy surgery, Simulation             | Objective observations or tests                       | Visual secondary task                        | To compare retention of mastoidectomy skills after virtual reality mastoidectomy training in distributed versus massed practice groups and to investigate CL during retention procedures | No difference in reaction time when performing mastoidectomy at transfer after learning from massed versus distributed practice                                 |
| Andrade 2012 <sup>4</sup>  | United States | Quantitative, non-experimental | 10 “senior” medical students, 10 internal medicine residents, 10 geriatric fellows | Geriatric home safety assessment, Simulation  | Quantitative surveys, Interviews                      | NASA-TLX                                     | To determine whether CL was associated with performance when learning from a 3D geriatric home safety simulation                                                                         | CL not associated with performance when measured concurrently                                                                                                   |
| Arico 2016 <sup>5</sup>    | France, Italy | Quantitative, experimental     | 12 air traffic control students                                                    | Air traffic management, Simulation            | Quantitative surveys, Objective observations or tests | NASA-TLX, EEG                                | To determine whether adjusting task complexity via adaptive automation would impact CL or performance during simulated air traffic management                                            | Adaptive automation was associated with shorter reaction time and better performance, but subjective CL did not differ                                          |
| Attrill 2016 <sup>6</sup>  | Australia     | Qualitative                    | 20 speech language pathology clinical supervisors                                  | Speech pathology, Workplace                   | Focus groups                                          | CL not measured                              | To qualitatively evaluate the experience of supervisors in teaching international students                                                                                               | Teachers felt that international students had overall higher CL than non-international students, particularly related to language issues                        |
| Avansino 2012 <sup>7</sup> | United States | Quantitative, experimental     | 3 surgical residents, 3 surgical fellows, 1 surgical attending                     | Computerized provider order entry, Simulation | Quantitative surveys, Documents/ artifacts            | NASA-TLX                                     | To compare CL associated with using a systematically designed order set compared with existing ad hoc order set for simulated entering of post-operative patient orders                  | Systematically designed order set was easier to use, was associated with lower CL and better performance                                                        |
| Bertram 1990 <sup>8</sup>  | United States | Quantitative, non-experimental | 39 internal medicine residents, 9 internal medicine attendings                     | Ambulatory patient care, Workplace            | Quantitative surveys                                  | Investigator-developed multi-item instrument | To develop an instrument to measure CL of physicians working in an internal medicine ambulatory setting, and to identify factors associated with CL                                      | CL positively associated with number of patients seen and fatigue; CL negatively associated with self-rated quality of care and satisfaction with care provided |
| Bertram 1992 <sup>9</sup>  | United States | Quantitative, non-experimental | 22 internal medicine residents                                                     | Ambulatory patient care, Workplace            | Quantitative surveys                                  | Investigator-developed multi-item instrument | To assess reliability and validity of adapted version of previously developed instrument (Bertram 1990) to measure CL in ambulatory internal                                             | CL positively associated with fatigue; CL negatively associated with level of experience, self-rated quality of care                                            |

Supplemental table B. Included studies.

|                              |                |                                |                                                        |                                                     |                                                       |                                                            | medicine setting, and to identify factors associated with CL                                                                                                                     | provided, and faculty-rated quality of care provided                                                                                                                                                                                                                             |
|------------------------------|----------------|--------------------------------|--------------------------------------------------------|-----------------------------------------------------|-------------------------------------------------------|------------------------------------------------------------|----------------------------------------------------------------------------------------------------------------------------------------------------------------------------------|----------------------------------------------------------------------------------------------------------------------------------------------------------------------------------------------------------------------------------------------------------------------------------|
| Bharathan 2013 <sup>10</sup> | United Kingdom | Quantitative, non-experimental | 25 gynecology residents, 9 gynecology attendings       | Laparoscopic gynecologic surgery, Simulation        | Objective observations or tests                       | NASA-TLX, Subjective Mental Effort Questionnaire           | To evaluate construct validity for a laparoscopic surgical simulator, to evaluate effectiveness as a training tool, and to examine factors associate with CL                     | CL was higher for more complex/difficult procedures; Experience positively associated with performance                                                                                                                                                                           |
| Blissett 2017 <sup>11</sup>  | Canada         | Quantitative, experimental     | 86 internal medicine residents                         | Cardiac auscultation, Simulation                    | Quantitative surveys, Objective observations or tests | Paas’ Subjective Rating of Mental Effort single item scale | To compare how terminally versus branching diagnostic schemas impacted performance and CL during simulated cardiac auscultation                                                  | Terminally branching diagnostic schemas (which should require less CL) were associated with lower CL, fewer errors, and greater diagnostic accuracy than hybrid diagnostic schemas                                                                                               |
| Boet 2017 <sup>12</sup>      | Canada         | Quantitative, experimental     | 20 surgical residents                                  | Post-operative crisis management, Simulation        | Objective observations or tests                       | Vibrotactile secondary task                                | To examine whether debriefing after an initial post-operative crisis simulation impacts CL during subsequent simulated post-operative crisis situations                          | Debriefing after an initial crisis scenario was associated with lower reaction time in a second scenario, compared with a control setting without debriefing                                                                                                                     |
| Britt 2015 <sup>13</sup>     | United States  | Quantitative, experimental     | 14 surgical assistant students                         | Laparoscopic intracorporeal suturing, Simulation    | Quantitative surveys, Objective observations or tests | NASA-TLX, Visual secondary task                            | To determine whether a new spatial secondary task (“ball-and-tunnel” signal detection task) would identify differences in CL when performing cadaveric versus simulated suturing | Secondary task performance lower and CL higher during cadaveric versus simulated laparoscopic suturing                                                                                                                                                                           |
| Broyles 2011 <sup>14</sup>   | United States  | Mixed methods, experimental    | 27 career and technical education pre-service teachers | Teaching, Workplace                                 | Objective observations or tests, Focus groups         | CL not measured                                            | To determine whether degree of CL impacted pre-service teachers’ ability to engage in reflection                                                                                 | Higher CL state interfered with ability to engage in reflection                                                                                                                                                                                                                  |
| Byrne 1998 <sup>15</sup>     | United Kingdom | Quantitative, non-experimental | 10 anesthesiology residents                            | Critical anesthesia incident management, Simulation | Objective observations or tests                       | CL not measured                                            | To examine whether critical incidents during simulated anesthesia negatively impacted accuracy of charting                                                                       | Accuracy of anesthesia charting was lower during periods of higher CL (simulated patient becomes critically ill), but inaccuracies varied depending on nature of critical incident (e.g., during pulmonary crisis, carbon dioxide level charted more accurately than heart rate) |
| Byrne 2013 <sup>16</sup>     | United Kingdom | Quantitative, non-experimental | 20 anesthesiology residents and attendings             | Administering anesthesia, Workplace                 | Objective observations or tests                       | Vibrotactile secondary task                                | To characterize inter- and intra-person variation in CL during actual administration of anesthesia                                                                               | Greater variation in reaction time within subjects than between subjects                                                                                                                                                                                                         |
| Cao 2007 <sup>17</sup>       | United States  | Quantitative, experimental     | 24 surgical residents, 6 surgical fellows              | Surgical ball transfer task, Simulation             | Objective observations or tests                       | CL not measured                                            | To determine whether adding haptic feedback during simulated surgical tasks mitigated performance decline associated with cognitively loading subjects                           | Cognitive loading reduced speed, but not accuracy, on surgical ball transfer task; Adding haptic feedback improved speed and accuracy when cognitively loaded; More experienced                                                                                                  |

Supplemental table B. Included studies.

|                               |                               |                            |                                                                                          |                                                |                                                       |                                                 |                                                                                                                                                                                            |                                                                                                                                                                                                                                                                                                    |
|-------------------------------|-------------------------------|----------------------------|------------------------------------------------------------------------------------------|------------------------------------------------|-------------------------------------------------------|-------------------------------------------------|--------------------------------------------------------------------------------------------------------------------------------------------------------------------------------------------|----------------------------------------------------------------------------------------------------------------------------------------------------------------------------------------------------------------------------------------------------------------------------------------------------|
|                               |                               |                            |                                                                                          |                                                |                                                       |                                                 |                                                                                                                                                                                            | surgeons were faster and more accurate                                                                                                                                                                                                                                                             |
| Chen 2015 <sup>18</sup>       | Canada                        | Quantitative, experimental | 60 “senior-level” nursing students                                                       | Cardiac and pulmonary auscultation, Simulation | Objective observations or tests                       | CL not measured                                 | To compare impact of low- versus high-fidelity instructional techniques on performance during simulated cardiac and pulmonary auscultation                                                 | Lower fidelity simulation associated with better performance and recall than high-fidelity simulation; Both simulations associated with better performance than control group                                                                                                                      |
| Chen 2015 <sup>19</sup>       | Canada                        | Quantitative, experimental | 77 “senior-level” nursing students                                                       | Cardiac and pulmonary auscultation, Simulation | Objective observations or tests                       | CL not measured                                 | To determine whether adjustments intended to impact intrinsic, extraneous, and germane cognitive load had any impact during simulated cardiac and pulmonary auscultation                   | Less complex task (lower intrinsic load) associated with better performance; Mixed (versus blocked) teaching associated with better performance (implying greater germane load); Authors also concluded that multiple versus single representations of heart sounds did not impact extraneous load |
| Chowriappa 2015 <sup>20</sup> | United Kingdom, United States | Quantitative, experimental | 22 surgical residents, 30 surgical fellows                                               | Robotic surgery tasks, Simulation              | Quantitative surveys, Objective observations or tests | NASA-TLX                                        | To determine whether an augmented-reality-based training (“Hands-on Surgical Training”) for simulated robotic assisted surgery impacted CL and performance compared with control condition | Intervention group performed better and had lower CL compared with control group                                                                                                                                                                                                                   |
| Chui 2014 <sup>21</sup>       | United States                 | Qualitative                | 8 practicing pharmacists                                                                 | Pharmacy handoffs, Simulation                  | Interviews                                            | CL not measured                                 | To describe and characterize “information hazards” present during pharmacy handovers, including whether these hazards were related to types of CL                                          | “Information hazards” present during pharmacy handovers included those related to CL: information overload (i.e., intrinsic load) and information scatter (i.e., extraneous load)                                                                                                                  |
| Crosby 1979 <sup>22</sup>     | United States                 | Quantitative, experimental | Experiment 1: 12 student pilots, 12 pilot instructors<br>Experiment 2: 11 student pilots | Flight, Simulation                             | Objective observations or tests                       | Visual secondary task                           | To determine whether differences in CL in single- versus dual-task conditions were impacted by student versus instructor status during simulated flight                                    | Differences in response time in single-versus dual-task condition were greater for students than for instructors; Instructors performed better than students; Later-phase students performed similar to instructors                                                                                |
| Cummings 2009 <sup>23</sup>   | United States                 | Quantitative, experimental | 31 student, recreational, and professional pilots                                        | Flight, Simulation                             | Quantitative surveys, Objective observations or tests | NASA-TLX                                        | To determine whether a heads-up informational display impacted performance and CL during simulated flight                                                                                  | No difference in CL or performance when using heads-up informational display during simulated flight                                                                                                                                                                                               |
| Dahlstrom 2009 <sup>24</sup>  | Sweden                        | Quantitative, experimental | 11 student pilots, 8 pilot instructors                                                   | Flight, Simulation and Workplace               | Objective observations or tests                       | Single item subjective rating of CL, Heart rate | To determine whether CL differed in simulated versus actual flight, and in particular flight segments                                                                                      | Neither subjective CL nor overall heart rate variability differed in in simulated compared with actual                                                                                                                                                                                             |

Supplemental table B. Included studies.

|                              |               |                                |                                                           |                                               |                                                       |                                                |                                                                                                                                                                                             |                                                                                                                                                                                                                                                                                                                                                               |
|------------------------------|---------------|--------------------------------|-----------------------------------------------------------|-----------------------------------------------|-------------------------------------------------------|------------------------------------------------|---------------------------------------------------------------------------------------------------------------------------------------------------------------------------------------------|---------------------------------------------------------------------------------------------------------------------------------------------------------------------------------------------------------------------------------------------------------------------------------------------------------------------------------------------------------------|
|                              |               |                                |                                                           |                                               |                                                       | variability, Eye movement                      |                                                                                                                                                                                             | flight; Heart rate variability lower for some flight segments, suggesting different degree of CL was required                                                                                                                                                                                                                                                 |
| Dankbaar 2016 <sup>25</sup>  | Netherlands   | Quantitative, experimental     | 79 4 <sup>th</sup> -year medical students                 | Emergency medical care, Simulation            | Quantitative surveys, Objective observations or tests | Investigator-developed multi-item instrument   | To compare intrinsic and germane load experienced by medical students during simulated emergency medical care when instructional groups offered differing levels of fidelity and complexity | Comparing control group (e-module only) with two intervention groups (e-module with low fidelity text-based simulations, e-module with high-fidelity simulation game): intrinsic load of e-module was lowest of any element; game group had higher intrinsic load, germane load, and engagement; Performance on skills assessment was same among three groups |
| Davis 2009 <sup>26</sup>     | UK            | Quantitative, non-experimental | 10 anesthesiology residents                               | Anesthesia crisis management, Simulation      | Objective observations or tests                       | Vibrotactile secondary task                    | To pilot the use of a “new secondary task measure of CL” (vibrotactile device) in simulated anesthesia crisis management                                                                    | During crisis portion of anesthesia simulation, response time increased and then went back to baseline                                                                                                                                                                                                                                                        |
| de Man 2014 <sup>27</sup>    | Netherlands   | Quantitative, experimental     | 17 anesthesiology residents, 10 anesthesiology attendings | Administering anesthesia, Simulation          | Quantitative surveys, Objective observations or tests | NASA-TLX                                       | To determine whether an “alarm-rich” simulated anesthesia environment would be associated with higher CL and reduced performance (time to detection of adverse events)                      | No difference in CL performance in alarm-free and alarm-rich simulations                                                                                                                                                                                                                                                                                      |
| DiStasi 2017 <sup>28</sup>   | Spain         | Quantitative, experimental     | 8 surgical residents, 8 surgical attendings               | Laparoscopic tasks, Simulation                | Quantitative surveys, Objective observations or tests | NASA-TLX, Gaze entropy and velocity            | To compare cognitive demand of single- versus multi-site simulated laparoscopic surgery                                                                                                     | CL (as measured by both gaze entropy and NASA-TLX) was greater with single- compared with multi-port approach; CL as measured by NASA-TLX was higher among residents compared with attendings                                                                                                                                                                 |
| Doig 2011 <sup>29</sup>      | United States | Quantitative, experimental     | 15 nursing students, 15 critical care nurses              | Arterial blood gas interpretation, Simulation | Quantitative surveys, Objective observations or tests | NASA-TLX                                       | To create and test a computer-aided tool to improve performance and reduce CL associated during simulated arterial blood gas interpretation                                                 | Accuracy and performance were better using tool compared with control group; CL was lower using the tool among nursing students, but not among practicing nurses                                                                                                                                                                                              |
| Dominessy 1991 <sup>30</sup> | United States | Quantitative, experimental     | 16 helicopter pilots                                      | Helicopter flight, Simulation                 | Objective observations or tests                       | Reaction time to visual instructions, NASA-TLX | To compare CL during simulated helicopter flight when tactical information was presented in three formats: text, graphic, and numeric, and to determine whether performing                  | CL was highest for text and lowest for graphic; Secondary task reduced performance and increased CL                                                                                                                                                                                                                                                           |

Supplemental table B. Included studies.

|                             |                            |                                 |                                                                   |                                      |                                                                  |                                                            |                                                                                                                                                                                                                                              |                                                                                                                                                                                                                                                      |
|-----------------------------|----------------------------|---------------------------------|-------------------------------------------------------------------|--------------------------------------|------------------------------------------------------------------|------------------------------------------------------------|----------------------------------------------------------------------------------------------------------------------------------------------------------------------------------------------------------------------------------------------|------------------------------------------------------------------------------------------------------------------------------------------------------------------------------------------------------------------------------------------------------|
|                             |                            |                                 |                                                                   |                                      |                                                                  |                                                            | an additional task (target acquisition search) impacted performance and CL                                                                                                                                                                   |                                                                                                                                                                                                                                                      |
| Donato 2014 <sup>31</sup>   | United States              | Quantitative, experimental      | 26 residents and 57 practicing physicians (all non-cardiologists) | Cardiac auscultation, Simulation     | Quantitative surveys, Objective observations or tests            | CL not measured                                            | To compare CL and performance in simulated cardiac auscultation for groups trained with a “lower CL” self-study group or a “higher CL” multimedia lecture group                                                                              | Participants in the “lower CL” self-study group improved more than the “higher CL” multimedia lecture group                                                                                                                                          |
| Durning 2012 <sup>32</sup>  | Netherlands, United States | Mixed methods, non-experimental | 25 attending internists                                           | Clinical reasoning, Simulation       | Quantitative surveys, Surveys (open-ended questions), Interviews | Utterances and pauses were used to infer CL                | To assess how contextual factors anticipated to increase CL (non-English-speaking patient, emotionally volatile patient, diagnostic suggestion, atypical presentation) impact clinical reasoning performance                                 | Contextual factors anticipated to increased CL were associated with poorer diagnostic reasoning performance                                                                                                                                          |
| Durning 2011 <sup>33</sup>  | United States              | Qualitative                     | 25 attending internists                                           | Patient interviewing, Simulation     | Surveys (open-ended questions), Interviews                       | CL not measured                                            | To qualitatively examine how contextual factors were felt to potentially impact clinical reasoning and CL                                                                                                                                    | Three primary themes arose: (1) Components influencing impact of contextual factors, (2) Mechanisms for addressing contextual factors, and (3) Consequences of contextual factors for patient care; These factors were also felt likely to impact CL |
| Fenik 2013 <sup>34</sup>    | Germany                    | Quantitative, experimental      | 14 final-year medical students, 16 medical residents              | Central line insertion, Simulation   | Objective observations or tests                                  | CL not measured                                            | To examine whether use of an “all-inclusive” central line kit during simulated central line insertion would reduce mistakes and improve performance compared with control condition in which subject has to retrieve all supplies separately | The intervention group made fewer mistakes and met more checklist items (better performance), and required less time to complete the insertion, than the control group                                                                               |
| Flindall 2015 <sup>35</sup> | UK                         | Quantitative, experimental      | 20 medical students                                               | Patient handoff, Simulation          | Quantitative surveys, Objective observations or tests            | NASA-TLX                                                   | To compare deterioration in recall of clinical information 2 hours after simulated patient handoffs for medical students who had completed a “mentally fatiguing high cognitive load task” compared to a control condition                   | High cognitive loading associated with reduced information freely recalled about cases                                                                                                                                                               |
| Fraser 2012 <sup>36</sup>   | Canada                     | Quantitative, non-experimental  | 84 1 <sup>st</sup> -year medical students                         | Heart sound auscultation, Simulation | Quantitative surveys, Objective observations or tests            | Paas’ Subjective Rating of Mental Effort single item scale | To determine whether emotion impacts CL during simulated cardiac auscultation, or post-training performance                                                                                                                                  | Invigoration was positively correlated with CL, and tranquility negatively correlated; Higher CL associated with lower odds of correctly diagnosing a cardiac murmur previously learned, but no impact on diagnosing novel cardiac murmur            |

Supplemental table B. Included studies.

|                            |               |                                |                                                                                                                           |                                         |                                                       |                                                                                         |                                                                                                                                                                                                         |                                                                                                                                                                                                                                                               |
|----------------------------|---------------|--------------------------------|---------------------------------------------------------------------------------------------------------------------------|-----------------------------------------|-------------------------------------------------------|-----------------------------------------------------------------------------------------|---------------------------------------------------------------------------------------------------------------------------------------------------------------------------------------------------------|---------------------------------------------------------------------------------------------------------------------------------------------------------------------------------------------------------------------------------------------------------------|
| Fraser 2014 <sup>37</sup>  | Canada        | Quantitative, experimental     | 116 final-year medical students                                                                                           | Aspirin overdose management, Simulation | Quantitative surveys, Objective observations or tests | Paas’ Subjective Rating of Mental Effort single item scale                              | To determine the impact of unexpected patient death during simulated aspirin overdose management on CL during simulation, and performance on an observed structured clinical encounter 3 months later   | Emotions were more negative and CL higher when the simulated patient unexpectedly died; performance 3 months later was lower in the group in which simulated patient died                                                                                     |
| Gaba 1990 <sup>38</sup>    | United States | Quantitative, non-experimental | 9 anesthesiology residents                                                                                                | Administering anesthesia, Workplace     | Objective observations or tests                       | Investigator-developed multi-item instrument, Mathematics problem secondary task        | To examine the use of a secondary task methodology (solving simple mathematics problems) to assess workload of anesthesiology residents during actual administration of anesthesia                      | Response times were higher during period requiring subjects to perform manual tasks; Response times did not correlate with level of training or case complexity                                                                                               |
| Gardner 2016 <sup>39</sup> | United States | Quantitative, experimental     | 41 1 <sup>st</sup> -year, 37 2 <sup>nd</sup> -year, 9 3 <sup>rd</sup> -year, and 2 4 <sup>th</sup> -year medical students | Laparoscopic suturing, Simulation       | Quantitative surveys, Objective observations or tests | NASA-TLX                                                                                | To examine how “seductive details” (interesting but tangential bits of information) affect workload and skill acquisition and transfer during simulated laparoscopic suturing                           | Control group had lower CL than “seductive details” group, and performed better at immediate testing and transfer                                                                                                                                             |
| Guru 2015 <sup>40</sup>    | United States | Quantitative, non-experimental | 2 surgical residents, 3 surgical fellows, 5 surgical attendings                                                           | Robotic surgical tasks, Simulation      | Objective observations or tests                       | EEG                                                                                     | To compare performance and CL when performing simulated robotic surgical tasks across groups with different levels of experience                                                                        | Performance was positively associated and CL negatively associated with experience                                                                                                                                                                            |
| Haji 2015 <sup>41</sup>    | Canada        | Quantitative, non-experimental | 8 1 <sup>st</sup> - and 2 <sup>nd</sup> -year medical students, 5 neurosurgical residents and attendings                  | Surgical knot tying, Simulation         | Objective observations or tests                       | Paas’ Subjective Rating of Mental Effort single item scale, Visual secondary task       | To compare CL as measured by secondary task performance and Paas’ single item during simulated surgical knot tying, among subjects of varying expertise                                                 | Experts performed better than novices; Experts had lower CL in single- but not dual-task condition; Moving from single- to dual-task increased CL to a greater degree among novices compared with experts; CL declined with practice but eventually plateaued |
| Haji 2015 <sup>42</sup>    | Canada        | Quantitative, experimental     | 28 1 <sup>st</sup> -year medical students                                                                                 | Surgical knot tying, Simulation         | Quantitative surveys, Objective observations or tests | Paas’ Subjective Rating of Mental Effort single item scale, Vibrotactile secondary task | To compare sensitivity of Subjective Rating of Mental Effort and reaction time to a vibrotactile stimulus when varying intrinsic load (simple versus complex task) during simulated surgical knot tying | CL did not differ between simple and complex groups; Subjectively rated CL decreased faster in simple group but no differences in rates of decrease in response time to vibrotactile stimulus                                                                 |
| Haji 2016 <sup>43</sup>    | Canada        | Quantitative, experimental     | 38 2 <sup>nd</sup> -year medical students                                                                                 | Lumbar puncture, Simulation             | Quantitative surveys, Objective observations or tests | Paas’ Subjective Rating of Mental Effort single item scale, Vibrotactile secondary task | To compare effects of simple versus complex lumbar puncture training scenario on CL and performance at acquisition, retention and transfer to                                                           | Simple group had lower CL and better performance during acquisition and retention phases; Simple group had slightly better performance at transfer to very complex scenario                                                                                   |

Supplemental table B. Included studies.

|                                |                        |                                |                                                                 |                                                     |                                                       |                 |                                                                                                                                                                                                                                                     |                                                                                                                                                                                                                                                                                 |
|--------------------------------|------------------------|--------------------------------|-----------------------------------------------------------------|-----------------------------------------------------|-------------------------------------------------------|-----------------|-----------------------------------------------------------------------------------------------------------------------------------------------------------------------------------------------------------------------------------------------------|---------------------------------------------------------------------------------------------------------------------------------------------------------------------------------------------------------------------------------------------------------------------------------|
|                                |                        |                                |                                                                 |                                                     |                                                       |                 | a “very complex” lumbar puncture scenario                                                                                                                                                                                                           | (fewer sterility breaches), but no differences in CL at transfer                                                                                                                                                                                                                |
| Hautz 2017 <sup>44</sup>       | Germany                | Quantitative, experimental     | 49 3 <sup>rd</sup> - and 4 <sup>th</sup> -year medical students | Breast examination, Simulation                      | Quantitative surveys, Objective observations or tests | CL not measured | To investigate how shame affects CL and learning during simulated breast examination by comparing two groups: high-fidelity simulated breast examination and actual breast examination of a standardized patient; Inferred that shame may impact CL | Students in the standardized patient group had higher shame but also performed better, inferring that shame may not impact CL                                                                                                                                                   |
| Hsieh 2012 <sup>45</sup>       | Taiwan                 | Quantitative, experimental     | 32 graduate students studying nuclear power plant operations    | Abnormal operating condition management, Simulation | Quantitative surveys, Objective observations or tests | NASA-TLX        | To determine whether a support system to help nuclear power plant operators manage abnormal operating procedures would reduce CL and improve performance compared with control condition during simulation                                          | With support system, subjects made decisions more quickly (under both simple and complex conditions) and accurately (under complex conditions only), and CL was lower                                                                                                           |
| Hsu 2015 <sup>46</sup>         | Taiwan, United Kingdom | Quantitative, non-experimental | 18 in-service F16 pilots                                        | Flight, Simulation                                  | Objective observations or tests                       | Eye tracking    | To determine whether CL was associated with performance in simulated flight                                                                                                                                                                         | Pupil size differed during different parts of the simulation; Better performance associated with greater gaze fixation; Experience alone was not associated with CL                                                                                                             |
| Hu 2015 <sup>47</sup>          | Singapore              | Quantitative, non-experimental | 47 medical students                                             | Laparoscopic surgical tasks, Simulation             | Quantitative surveys, Objective observations or tests | NASA-TLX        | To examine impact of experience level on performance and CL before and after training on simulated laparoscopic tasks, and to determine whether NASA-TLX could be used to assess CL during laparoscopic surgical training                           | CL decreased and performance improved after training; CL was higher with more complex tasks                                                                                                                                                                                     |
| Hussein 2016 <sup>48</sup>     | Egypt, United States   | Quantitative, non-experimental | Surgical trainee and mentor                                     | Robotic assisted urologic surgery, Workplace        | Quantitative surveys, Objective observations or tests | NASA-TLX, EEG   | To assess for correlations between CL of a surgical mentor and surgical trainee during robotic-assisted urologic surgery                                                                                                                            | No correlation between mentor’s EEG and trainee’s NASA-TLX score; Several correlations were identified between NASA-TLX subscores of the mentor and the trainee, most notably that when the trainee had higher CL, the mentor was paying more attention and was less distracted |
| Jayaprakash 2016 <sup>49</sup> | United States          | Quantitative, non-experimental | 11 fellow and 3 attending critical care physicians              | Assessment of critically ill patient, Simulation    | Quantitative surveys, Objective observations or tests | NASA-TLX        | To compare cognitive load of collecting a clinical history for a critically ill patient following, or in parallel with, the primary survey                                                                                                          | No difference in CL for series versus parallel timing for collecting clinical history; CL decreased with subsequent cases                                                                                                                                                       |

Supplemental table B. Included studies.

|                            |                       |                                |                                                                                       |                                                              |                                                       |                                                                       |                                                                                                                                                                                                                                          |                                                                                                                                                                                                                      |
|----------------------------|-----------------------|--------------------------------|---------------------------------------------------------------------------------------|--------------------------------------------------------------|-------------------------------------------------------|-----------------------------------------------------------------------|------------------------------------------------------------------------------------------------------------------------------------------------------------------------------------------------------------------------------------------|----------------------------------------------------------------------------------------------------------------------------------------------------------------------------------------------------------------------|
| Jutric 2017 <sup>50</sup>  | United States         | Quantitative, experimental     | 5 high school students, 5 attending hepatobiliary surgeons                            | Targeting tumors for laparoscopic ablation, Simulation       | Quantitative surveys, Objective observations or tests | NASA-TLX                                                              | To compare CL and performance during four different approaches using a novel 3D guidance system for targeting tumors in simulated laparoscopic ablation: in line with and without 3D guidance, and off-axis with and without 3D guidance | Performance was better and CL lower with 3D guidance; Novices initially performed more poorly but with final trial there was no difference between novices and experts                                               |
| Kataoka 2011 <sup>51</sup> | Japan                 | Quantitative, experimental     | 32 10 nursing students, 9 “inexperienced” nurses, 13 “experienced” nurses             | Operating medication infusion pump, Simulation               | Objective observations or tests                       | NASA-TLX, Eye tracking, Heart rate variability, Respiratory frequency | To examine how time pressure and dual tasking impacted CL of nursing students and nurses during simulated operation of a medication infusion pump                                                                                        | CL as measured by NASA-TLX was higher under both time pressure and dual tasking for all subjects; Eye fixation was lower for all subjects under time pressure; LF/HF was higher for students only under dual tasking |
| Klein 2009 <sup>52</sup>   | United States         | Quantitative, experimental     | 15 medical students                                                                   | Robotic assisted surgery, Simulation                         | Quantitative surveys, Objective observations or tests | NASA-TLX, Multiple Resources Questionnaire                            | To compare CL and performance under 2D and 3D vision when performing simulated robotic assisted surgical tasks                                                                                                                           | In 3D condition (compared with 2D), performance somewhat better (more transfers) and CL lower                                                                                                                        |
| Klein 2012 <sup>53</sup>   | United States         | Quantitative, experimental     | 15 1 <sup>st</sup> -year medical students                                             | Laparoscopic and robotic-assisted surgical tasks, Simulation | Quantitative surveys, Objective observations or tests | Multiple Resources Questionnaire, Dundee Stress State Questionnaire   | To compare CL among novices using the Foundations of Laparoscopic Surgery for performing simulated surgical tasks                                                                                                                        | CL did not differ between systems; Minor differences in performance                                                                                                                                                  |
| Lee 2014 <sup>54</sup>     | United States         | Quantitative, experimental     | 4 surgical residents, 6 laparoscopic surgery attendings, 3 robotic surgery attendings | Laparoscopic and robotic-assisted surgical tasks, Simulation | Quantitative surveys, Objective observations or tests | NASA-TLX                                                              | To compare CL and performance among laparoscopic and robotic surgery novices and experts performing simulated laparoscopic and robotic surgery                                                                                           | Novices and robotic experts had lower CL and better performance in robotic versus laparoscopic approach; Laparoscopic experts had lower CL with laparoscopic versus robotic                                          |
| Lee 2017 <sup>55</sup>     | United States         | Quantitative, non-experimental | 6 neuroradiology fellows, 12 attending neuroradiologists                              | Interpreting neuroradiology images, Workplace                | Quantitative surveys                                  | NASA-TLX                                                              | To determine whether redesign of a radiology workspace would reduce CL required to completed daily work and improve overall satisfaction                                                                                                 | After redesign participants reported reduced levels of CL, better work quality, and greater satisfaction                                                                                                             |
| Lee 2017 <sup>56</sup>     | United States         | Quantitative, experimental     | 32 surgical residents and fellows                                                     | Surgical tasks, Simulation                                   | Quantitative surveys, Objective observations or tests | NASA-TLX                                                              | To determine whether feedback from an expert mentor during learning of simulated surgical tasks would impact CL and performance, compared with those who completed the learning in a self-directed fashion                               | Subjects that received feedback performed better and had lower CL than those not receiving feedback                                                                                                                  |
| Liang 2010 <sup>57</sup>   | Taiwan, United States | Quantitative, experimental     | 22 “junior expert” and 20 “senior                                                     | Aircraft maintenance, Simulation                             | Quantitative surveys, Objective observations or tests | NASA-TLX                                                              | To determine whether work instructions administered to aircraft mechanics via an online maintenance                                                                                                                                      | CL was lower and performance better with online maintenance assistance platform than with paper instructions                                                                                                         |

Supplemental table B. Included studies.

|                            |                                    |                                |                                                                                                               |                                                           |                                                                 |                                                                  |                                                                                                                                                                                              |                                                                                                                                                                                                                            |
|----------------------------|------------------------------------|--------------------------------|---------------------------------------------------------------------------------------------------------------|-----------------------------------------------------------|-----------------------------------------------------------------|------------------------------------------------------------------|----------------------------------------------------------------------------------------------------------------------------------------------------------------------------------------------|----------------------------------------------------------------------------------------------------------------------------------------------------------------------------------------------------------------------------|
|                            |                                    |                                | expert” aircraft technicians                                                                                  |                                                           |                                                                 |                                                                  | assistance platform would be associated with better performance and lower CL compared with simple paper instructions                                                                         |                                                                                                                                                                                                                            |
| Lowndes 2015 <sup>58</sup> | United States                      | Quantitative, experimental     | 12 medical students                                                                                           | Laparoscopic single site surgery, Simulation              | Quantitative surveys, Objective observations or tests           | NASA-TLX                                                         | To compare CL in simulated conventional laparoscopy with two approaches to laparoscopic single site surgery (extracorporeal crossing of hands versus intracorporeal crossing of instruments) | Extracorporeal crossing of hands had higher CL and lower performance than conventional laparoscopy or intracorporeal crossing of instruments                                                                               |
| Maxwell 2017 <sup>59</sup> | United States                      | Quantitative, experimental     | 573 Army National Guard soldiers                                                                              | Infantry soldier training, Simulation                     | Surveys (open-ended questions), Objective observations or tests | NASA-TLX                                                         | To determine whether virtual, live, or combined virtual and live training of infantry soldiers would be associated with different CL and performance                                         | Combined virtual and live training was associated with lower CL compared with virtual training alone; Combined virtual and live training was associated with better performance than either virtual or live training alone |
| Mazur 2014 <sup>60</sup>   | United States                      | Quantitative, experimental     | 5 radiation oncology residents, 4 radiation oncology attendings                                               | Radiation therapy planning, Simulation                    | Quantitative surveys, Objective observations or tests           | NASA-TLX                                                         | To determine how CL affects errors during simulated radiation therapy planning                                                                                                               | Higher CL was associated with more frequent errors; Residents made errors more often than faculty                                                                                                                          |
| Modi 2016 <sup>61</sup>    | UK                                 | Quantitative, non-experimental | 27 “higher surgical trainees”                                                                                 | Laparoscopic suturing, Simulation                         | Quantitative surveys, Objective observations or tests           | SURG-TLX, Heart rate                                             | To determine impact of temporal stressor on resident surgeons' CL and technical performance during simulated laparoscopic suturing                                                           | Time pressure increased CL and decreased performance                                                                                                                                                                       |
| Mohamed 2014 <sup>62</sup> | Canada                             | Quantitative, non-experimental | 8 1 <sup>st</sup> -year gastroenterology residents, 10 practicing gastroenterologists and colorectal surgeons | Endoscopic procedures, Workplace                          | Quantitative surveys                                            | Modified NASA-TLX                                                | To modify the NASA-TLX for use during endoscopy training and to use the modified tool to map trainees’ workload during early phases of endoscopy training                                    | Gastroenterology residents had higher CL than attendings; CL decreased more quickly for upper endoscopy than colonoscopy procedures                                                                                        |
| Montero 2011 <sup>63</sup> | United States                      | Quantitative, experimental     | 14 surgical residents and fellows                                                                             | Single- and multi-incision laparoscopic tasks, Simulation | Quantitative surveys, Objective observations or tests           | NASA-TLX                                                         | To compare CL and performance associated with simulated standard laparoscopic approach versus single incision laparoscopic surgery approach                                                  | Single incision approach was associated with higher CL and lower performance                                                                                                                                               |
| Moore 2015 <sup>64</sup>   | China, New Zealand, United Kingdom | Quantitative, non-experimental | 32 “qualified and trainee surgeons”                                                                           | Robotic and laparoscopic tasks, Simulation                | Quantitative surveys, Objective observations or tests           | Rating Scale for Mental Effort, SURG-TLX, Heart rate variability | To CL and performance among “qualified and trainee” surgeons performing simulated laparoscopic versus robotic surgical tasks                                                                 | CL was lower and performance higher on robotic versus laparoscopic platform                                                                                                                                                |

**Supplemental table B. Included studies.**

|                              |                      |                                 |                         |                                     |                                                       |                                                                                                                    |                                                                                                                                                                                                                               |                                                                                                                                                                                                                                                                                                                                                                                                 |
|------------------------------|----------------------|---------------------------------|-------------------------|-------------------------------------|-------------------------------------------------------|--------------------------------------------------------------------------------------------------------------------|-------------------------------------------------------------------------------------------------------------------------------------------------------------------------------------------------------------------------------|-------------------------------------------------------------------------------------------------------------------------------------------------------------------------------------------------------------------------------------------------------------------------------------------------------------------------------------------------------------------------------------------------|
| Moos 2014 <sup>65</sup>      | United States        | Mixed methods, non-experimental | 26 pre-service teachers | Teaching, Workplace                 | Quantitative surveys, Interviews                      | Paas’ Subjective Rating of Mental Effort single item scale, Investigator-developed multi-item instrument           | To characterize how types and levels of CL change throughout teacher training                                                                                                                                                 | Overall CL decreased over the course of training; Subjects became increasingly aware of their CL throughout training and felt that their CL as teachers limited their ability to make real-time modifications during teaching                                                                                                                                                                   |
| Morris 2006 <sup>66</sup>    | Australia, Hong Kong | Quantitative, experimental      | 42 trainee pilots       | Flight, Simulation                  | Objective observations or tests                       | CL not measured                                                                                                    | To determine whether errors occurred more frequently with higher-CL flight simulations                                                                                                                                        | Higher complexity and CL was associated with increased likelihood of errors                                                                                                                                                                                                                                                                                                                     |
| Mouraviev 2016 <sup>67</sup> | United States        | Quantitative, experimental      | 21 surgical residents   | Nephrectomy, Simulation             | Quantitative surveys                                  | NASA-TLX                                                                                                           | To determine whether simulated nephrectomy using a virtual simulation training environment, or a porcine model, was associated with differing levels of CL                                                                    | CL was similar for both platforms                                                                                                                                                                                                                                                                                                                                                               |
| Mulcock 2017 <sup>68</sup>   | United States        | Quantitative, non-experimental  | 140 nursing students    | Care of inpatients, Workplace       | Quantitative surveys                                  | Investigator-developed single item                                                                                 | To determine whether having continuity of instructors during inpatient clinical rotations was associated with lower levels of stress than conventional placements                                                             | Working with the same instructor and in the same facility over first two clinical rotations was associated with reduced stress, which the authors suggest relates to reduce extraneous load                                                                                                                                                                                                     |
| Murai 2010 <sup>69</sup>     | Japan                | Quantitative, non-experimental  | 10 ship piloting cadets | Ship piloting, Simulation           | Objective observations or tests                       | Heart rate variability                                                                                             | To evaluate the CL of a ship cadet undergoing simulator training                                                                                                                                                              | Various aspects of ship navigation task were associated with varying levels of CL                                                                                                                                                                                                                                                                                                               |
| Muresan 2010 <sup>70</sup>   | United States        | Quantitative, experimental      | 41 medical students     | Intracorporeal suturing, Simulation | Quantitative surveys, Objective observations or tests | NASA-TLX                                                                                                           | To compare CL and performance among medical students learning to perform simulated intracorporeal suturing using one of four platforms: laparoscopic suturing, laparoscopic drills, open suturing, and virtual reality drills | Laparoscopic groups had slightly reduced CL compared with other two groups; Performance varied among the four groups but was not clearly linked to level of CL                                                                                                                                                                                                                                  |
| Naismith 2015 <sup>71</sup>  | Canada               | Mixed methods, non-experimental | 38 medical residents    | Chest tube insertion, Simulation    | Quantitative surveys, Interviews                      | Paas’ Subjective Rating of Mental Effort single item scale, NASA-TLX, Investigator-developed multi-item instrument | To compare several measures of CL among medical residents performing simulated chest tube insertion                                                                                                                           | Total CL scaled to 0-1 scale differed across the different measurement techniques but all were correlated; Qualitative themes included those related to intrinsic load (prior experience, appropriateness for level of training, task complexity), extraneous load (fidelity, anxiety, impact of hidden curriculum), and germane load (promoting effortful processing, opportunities to observe |

Supplemental table B. Included studies.

|                           |               |                                |                                                                         |                                            |                                                       |                             |                                                                                                                                                                                                                                          |                                                                                                                                                                                                                                   |
|---------------------------|---------------|--------------------------------|-------------------------------------------------------------------------|--------------------------------------------|-------------------------------------------------------|-----------------------------|------------------------------------------------------------------------------------------------------------------------------------------------------------------------------------------------------------------------------------------|-----------------------------------------------------------------------------------------------------------------------------------------------------------------------------------------------------------------------------------|
|                           |               |                                |                                                                         |                                            |                                                       |                             |                                                                                                                                                                                                                                          | variations in practice, opportunities for repetitive practice, opportunities for expert feedback)                                                                                                                                 |
| Rojas 2014 <sup>72</sup>  | Canada        | Quantitative, non-experimental | 13 1 <sup>st</sup> -year medical students                               | One-handed surgical knot tying, Simulation | Objective observations or tests                       | Vibrotactile secondary task | To determine whether simple reaction time or recognition reaction time as a secondary task measure would be more sensitive to detect differences in CL as medical students learn to tie one-handed surgical knots in a simulated setting | Simple reaction time (detecting a vibrotactile stimulus) was more sensitive than recognition reaction time (detecting only one of two different types of vibrotactile stimuli)                                                    |
| Saleem 2007 <sup>73</sup> | United States | Mixed methods, experimental    | 16 practicing nurses                                                    | Using clinical reminders, Simulation       | Quantitative surveys, Objective observations or tests | NASA-TLX                    | To determine whether a redesigned clinical reminder system would be associated with lower CL and improved learnability, usability, and efficiency than the existing system                                                               | Redesigned system associated with lower levels of mental demand and frustration (though only statistically significant with one-tailed t-tests); Redesigned system associated with better learnability, usability, and efficiency |
| Sato 2016 <sup>74</sup>   | Japan         | Quantitative, non-experimental | 13 anesthesiology residents, 9 anesthesiology attendings                | Administering anesthesia, Simulation       | Objective observations or tests                       | Secondary mathematics task  | To determine whether anesthesiology attendings or residents have different CL and performance during simple and complex simulated anesthesia scenarios                                                                                   | No difference in CL or performance for simple scenarios; For complex scenarios residents had higher CL and lower performance than residents; CL was higher in both groups for complex versus simple tasks                         |
| Saus 2006 <sup>75</sup>   | Norway        | Quantitative, experimental     | 40 1 <sup>st</sup> -year police academy students                        | Police firearm use, Simulation             | Quantitative surveys, Objective observations or tests | Heart rate variability      | To determine whether situational awareness training would reduce CL and improve performance among police academy students undergoing simulated firearm use training, compared with control group                                         | Situational awareness trained group had lower CL but did not perform differently from control group                                                                                                                               |
| Saus 2010 <sup>76</sup>   | Norway        | Quantitative, non-experimental | 32 Navy officer cadets                                                  | Ship navigation, Simulation                | Quantitative surveys, Objective observations or tests | Heart rate variability      | To determine whether a low- or high-CL training condition during simulated ship navigation training would impact contributors to learning                                                                                                | In low CL condition learning was impacted by experience, perceived realism and situational awareness; In high CL condition perceived realism and situational awareness impacted learning                                          |
| Scerbo 2013 <sup>77</sup> | United States | Quantitative, non-experimental | 7 “expert surgeons,” 11 “intermediate surgeons,” 17 surgical assistants | Laparoscopic surgical tasks, Simulation    | Objective observations or tests                       | Visual secondary task       | To determine whether a visual secondary task could distinguish among levels of expertise in simulated laparoscopic tasks                                                                                                                 | Advancing expertise associated with lower CL, better performance, and faster completion times                                                                                                                                     |
| Scerbo 2017 <sup>78</sup> | United States | Quantitative, non-experimental | 12 surgical residents and surgical assistants                           | Single- and multi-incision laparoscopic    | Quantitative surveys, Objective observations or tests | Visual secondary task       | To examine differences in CL and performance associated with single-incision laparoscopic procedures                                                                                                                                     | CL was higher and performance lower in single-incision versus traditional laparoscopic approach                                                                                                                                   |

Supplemental table B. Included studies.

|                                 |                               |                                       |                                                                                                                                                 |                                                          |                                                             |                                                           |                                                                                                                                                                                              |                                                                                                                                                                                                                                                                                                                                                                                                                       |
|---------------------------------|-------------------------------|---------------------------------------|-------------------------------------------------------------------------------------------------------------------------------------------------|----------------------------------------------------------|-------------------------------------------------------------|-----------------------------------------------------------|----------------------------------------------------------------------------------------------------------------------------------------------------------------------------------------------|-----------------------------------------------------------------------------------------------------------------------------------------------------------------------------------------------------------------------------------------------------------------------------------------------------------------------------------------------------------------------------------------------------------------------|
|                                 |                               |                                       |                                                                                                                                                 | surgical tasks,<br>Simulation                            |                                                             |                                                           | compared with traditional<br>laparoscopic procedures                                                                                                                                         |                                                                                                                                                                                                                                                                                                                                                                                                                       |
| Scerbo 2017 <sup>79</sup>       | United States                 | Quantitative,<br>experimental         | 22 surgical assistant<br>students, 5<br>premedical students                                                                                     | Intracorporeal<br>suturing and knot<br>tying, Simulation | Quantitative surveys,<br>Objective<br>observations or tests | Visual secondary<br>task                                  | To assess CL and performance<br>associated with simulated<br>intracorporeal suturing and knot tying<br>over varying levels of transfer                                                       | Performance declined on initial<br>reassessment but then returned to<br>baseline; CL was inversely correlated<br>with performance                                                                                                                                                                                                                                                                                     |
| Seidelman<br>2010 <sup>80</sup> | United States                 | Quantitative,<br>non-<br>experimental | 14 medical students                                                                                                                             | Laparoscopic ring<br>transfer, Simulation                | Quantitative surveys,<br>Objective<br>observations or tests | NASA-TLX                                                  | To assess CL and performance<br>associated with single versus tiled<br>surgical displays for a simulated<br>laparoscopic task                                                                | Single versus tiled display did not<br>affect CL or accuracy                                                                                                                                                                                                                                                                                                                                                          |
| Sewell 2016 <sup>81</sup>       | Netherlands,<br>United States | Quantitative,<br>non-<br>experimental | 110 1 <sup>st</sup> -year, 179 2 <sup>nd</sup> -<br>year, 174 3 <sup>rd</sup> -year, 12<br>4 <sup>th</sup> -year<br>gastroenterology<br>fellows | Colonoscopy,<br>Workplace                                | Quantitative surveys                                        | Investigator-<br>developed multi-<br>item instrument      | To develop and collect validity for<br>evidence for an instrument to<br>estimate intrinsic, extraneous, and<br>germane load during colonoscopy<br>learning                                   | Intrinsic, extraneous, and germane<br>load were all inversely associated<br>with prior experience                                                                                                                                                                                                                                                                                                                     |
| Sewell 2017 <sup>82</sup>       | Netherlands,<br>United States | Quantitative,<br>non-<br>experimental | 110 1 <sup>st</sup> -year, 179 2 <sup>nd</sup> -<br>year, 174 3 <sup>rd</sup> -year, 12<br>4 <sup>th</sup> -year<br>gastroenterology<br>fellows | Colonoscopy,<br>Workplace                                | Quantitative surveys                                        | Investigator-<br>developed multi-<br>item instrument      | To identify characteristics of learners,<br>patients/tasks, environments, and<br>teachers that are associated with<br>intrinsic, extraneous, and germane<br>load during colonoscopy learning | Intrinsic load associated with year in<br>training, prior colonoscopy<br>experience, fatigue, patient tolerance,<br>number of maneuvers performed,<br>and supervisor takeover of<br>colonoscopy; Extraneous load<br>associated with fatigue, colonoscopy<br>queue order, supervisor engagement<br>and confidence, and supervisor<br>takeover of colonoscopy; Germane<br>load associated with supervisor<br>engagement |
| Sexton 2017 <sup>83</sup>       | Egypt, United<br>States       | Quantitative,<br>non-<br>experimental | 3 lead surgeons, 3<br>assistant surgeons, 3<br>physician assistants,<br>7 scrub nurses, 11<br>circulating nurses                                | Robot-assisted<br>prostatectomy,<br>Workplace            | Quantitative surveys,<br>Objective<br>observations or tests | NASA-TLX                                                  | To investigate how requests during<br>robotic-assisted prostatectomy<br>impact CL and efficiency in the<br>operating room                                                                    | Number of requests and request<br>duration increased surgeons' CL                                                                                                                                                                                                                                                                                                                                                     |
| Shachak 2009 <sup>84</sup>      | Canada, Israel                | Qualitative                           | 5 residents, 20<br>practicing primary<br>care physicians                                                                                        | Electronic health<br>record use, Workplace               | Interviews                                                  | CL not measured,<br>but was<br>estimated<br>qualitatively | To examine the how use of an<br>electronic medical record impacts<br>physicians' CL                                                                                                          | Highest CL was perceived with<br>diagnosing, reasoning and treating<br>severe or multiple medical conditions;<br>the electronic medical record was felt<br>to reduce CL, particularly in terms of<br>extraneous load, as results and<br>histories were easy to find                                                                                                                                                   |
| Shewokis<br>2017 <sup>85</sup>  | United States                 | Quantitative,<br>experimental         | 10 3 <sup>rd</sup> -year medical<br>students                                                                                                    | Laparoscopic tasks,<br>Simulation                        | Quantitative surveys,<br>Objective<br>observations or tests | Functional near<br>infrared<br>spectroscopy               | To compare CL and performance in<br>blocked versus random practice<br>during simulated laparoscopic tasks                                                                                    | Compared with blocked practice,<br>random practice was associated with<br>lower CL and better performance                                                                                                                                                                                                                                                                                                             |

**Supplemental table B. Included studies.**

|                               |                          |                                 |                                                                                   |                                                              |                                                       |                                                                      |                                                                                                                                                                                    |                                                                                                                                                                                              |
|-------------------------------|--------------------------|---------------------------------|-----------------------------------------------------------------------------------|--------------------------------------------------------------|-------------------------------------------------------|----------------------------------------------------------------------|------------------------------------------------------------------------------------------------------------------------------------------------------------------------------------|----------------------------------------------------------------------------------------------------------------------------------------------------------------------------------------------|
| Sibbald 2013 <sup>86</sup>    | Canada, Netherlands      | Quantitative, experimental      | 191 internal medicine residents                                                   | Cardiac auscultation, Simulation                             | Objective observations or tests                       | Paas’ Subjective Rating of Mental Effort single item scale           | To determine whether using a checklist during simulated cardiac auscultation learning impacts CL and diagnostic accuracy                                                           | Use of checklist was associated with reduced CL and improved accuracy compared with no checklist                                                                                             |
| Sibbald 2013 <sup>87</sup>    | Canada, Netherlands      | Quantitative, non-experimental  | 15 cardiology fellows                                                             | Electrocardiogram interpretation, Simulation                 | Quantitative surveys, Objective observations or tests | Paas’ Subjective Rating of Mental Effort single item scale           | To determine whether use of a checklist during experts’ verification of electrocardiogram interpretation would reduce errors or impact CL                                          | Using the checklist during verification of interpretation was associated with correction of errors; CL was not affected by use of checklist (i.e., expertise reversal effect was not seen)   |
| Stefanidis 2010 <sup>88</sup> | United States            | Quantitative, non-experimental  | 34 medical students                                                               | Laparoscopic and robotic intracorporeal suturing, Simulation | Quantitative surveys, Objective observations or tests | NASA-TLX                                                             | To compare laparoscopic versus robotic approach to simulated intracorporeal suturing                                                                                               | CL was lower and performance better on robotic versus laparoscopic platform                                                                                                                  |
| Strang 2014 <sup>89</sup>     | Australia, United States | Quantitative, non-experimental  | 5 Royal Australian Air Force Air Battle Management Officers                       | Flight, Simulation                                           | Quantitative surveys, Objective observations or tests | Overall Workload Scale, Heart rate variability                       | To assess for correlations between a subjective measure of CL and heart rate variability among pilots performing flight simulation                                                 | Heart rate variability and subjectively rated CL correlated, but the correlations varied across different simulator tasks                                                                    |
| Svensson 1993 <sup>90</sup>   | Sweden                   | Quantitative, non-experimental  | Experiment 1: 21 ground attack pilots<br>Experiment 2: 6 ground attack pilots     | Military flight, Simulation                                  | Quantitative surveys                                  | Urinary adrenaline and noradrenalin                                  | To identify contributors to CL during simulated military flight and to correlated CL with performance                                                                              | Three primary constructs contributed to CL: challenge, effort, and performance; Performance was inversely correlated with CL and challenge positively correlated; CL decreased with training |
| Szulewski 2014 <sup>91</sup>  | Canada                   | Mixed methods, non-experimental | 1 medical student, 3 emergency medicine residents, 1 emergency medicine attending | Resuscitation team leading, Simulation                       | Interviews, Video and audio recordings                | CL not measured                                                      | To assess feasibility of using eye tracking technology to monitor CL in simulated resuscitation team leading                                                                       | Eye tracking device did not interfere with simulation tasks                                                                                                                                  |
| Tattersall 1995 <sup>92</sup> | UK                       | Quantitative, non-experimental  | 11 trainee flight engineers                                                       | Diagnosing flight faults and incidents, Simulation           | Quantitative surveys, Objective observations or tests | Subjective Workload Assessment Technique, Heart rate variability     | To monitor “naturally occurring” fluctuations in CL during simulated diagnosis of flight faults and incidents, and to compare subjective ratings of CL with heart rate variability | Heart rate variability lower during more challenging simulation tasks; Subjective assessment of CL correlated with heart rate variability                                                    |
| Teel 2009 <sup>93</sup>       | Japan, United States     | Quantitative, non-experimental  | 10 Marine cadets                                                                  | Ship navigation, Simulation                                  | Objective observations or tests                       | Heart rate variability                                               | To evaluate the CL of a cadet undergoing simulator training using heart rate variability                                                                                           | Heart rate variability varied with different tasks during simulation                                                                                                                         |
| Theodoraki 2015 <sup>94</sup> | Germany                  | Quantitative, experimental      | 8 otorhinolaryngology residents, 2 otorhinolaryngology attendings                 | Functional endoscopic sinus surgery, Workplace               | Objective observations or tests                       | Heart rate variability, Respiratory frequency, Masticator muscle EMG | To compare CL and mental distress of surgeons performing functional endoscopic sinus surgery with and without a navigation system                                                  | Navigation system did not impact CL; CL was higher in less experienced group                                                                                                                 |

**Supplemental table B. Included studies.**

|                             |                     |                                 |                                                                           |                                                          |                                                                     |                                              |                                                                                                                                                                                                                                                                                                        |                                                                                                                                                                                                                                                                                                                                                                        |
|-----------------------------|---------------------|---------------------------------|---------------------------------------------------------------------------|----------------------------------------------------------|---------------------------------------------------------------------|----------------------------------------------|--------------------------------------------------------------------------------------------------------------------------------------------------------------------------------------------------------------------------------------------------------------------------------------------------------|------------------------------------------------------------------------------------------------------------------------------------------------------------------------------------------------------------------------------------------------------------------------------------------------------------------------------------------------------------------------|
| Thomas 2017 <sup>95</sup>   | United States       | Quantitative, non-experimental  | 79 practicing nurses                                                      | Administering medications to patients, Workplace         | Quantitative surveys, Objective observations or tests               | NASA-TLX                                     | To examine how interruptions and distractions impact CL among nurses administering medications to patients in the workplace, and to assess for impact on medication administration errors                                                                                                              | CL increased with number of distractions and interruptions; CL did not impact medication administration errors (though the absolute number of errors was very low overall)                                                                                                                                                                                             |
| Tien 2015 <sup>96</sup>     | UK                  | Quantitative, non-experimental  | 7 “expert” surgeons (attending and senior residents), 6 “junior” surgeons | Open inguinal hernia repair, Workplace                   | Quantitative surveys, Objective observations or tests               | NASA-TLX, Eye tracking                       | To assess differences in CL and gaze behavior between expert and junior surgeons during open inguinal hernia repair                                                                                                                                                                                    | CL was higher for junior surgeons; Experts had higher fixation frequency and dwell time during particular parts of the procedure                                                                                                                                                                                                                                       |
| Tomasko 2012 <sup>97</sup>  | United States       | Quantitative, experimental      | 31 3 <sup>rd</sup> - and 4 <sup>th</sup> year medical students            | Surgical tasks, Simulation                               | Quantitative surveys, Objective observations or tests               | NASA-TLX, Visual secondary task              | To compare CL and performance during simulated surgical tasks in sleep-deprived versus non-sleep-deprived states                                                                                                                                                                                       | CL was higher in sleep-deprived group, but performance did not differ                                                                                                                                                                                                                                                                                                  |
| Tremblay 2017 <sup>98</sup> | Canada, Netherlands | Mixed methods, non-experimental | 143 2 <sup>nd</sup> -year undergraduate pharmacy students                 | Medication dispensing and patient counseling, Simulation | Quantitative surveys, Objective observations or tests, Focus groups | Investigator-developed multi-item instrument | To determine whether a more authentic “simulated clinical environment” is associated with different intrinsic and extraneous CL compared with a less authentic environment among undergraduate pharmacy students performing simulated medication dispensing and counseling with a standardized patient | Both intrinsic and extraneous load were higher in simulated clinical immersion versus standard environment; Simulated clinical environment was associated with higher self-perceived learning; Students felt they could learn clinical reasoning better in standard environment but could learn to accomplish technical tasks better in simulated clinical environment |
| Walker 2015 <sup>99</sup>   | Canada              | Qualitative                     | 3 2 <sup>nd</sup> -year dental students, 1 dental attending               | Tooth mold production, Simulation                        | Interviews, Video recordings                                        | Investigator-developed single item           | To identify aspects of simulated tooth mold production that were associated with CL, comparing a dental attending with dental students                                                                                                                                                                 | Many parts of the simulation were noted by students to have high CL, but only a single part was noted by the attending to have high CL                                                                                                                                                                                                                                 |
| Weigl 2015 <sup>100</sup>   | Germany             | Quantitative, non-experimental  | 63 attending surgeons                                                     | General and orthopedic surgical operations, Workplace    | Quantitative surveys, Objective observations or tests               | NASA-TLX                                     | To determine whether interruptions during actual surgical operations were associated with higher CL, and to identify other factors impacting CL, among attending surgeons                                                                                                                              | Situational stress was higher during teaching than non-teaching cases; CL was higher for longer cases; Interruptions were associated with increased CL (distraction component of NASA-TLX)                                                                                                                                                                             |
| Weigl 2016 <sup>101</sup>   | Germany             | Quantitative, experimental      | 19 1 <sup>st</sup> - and 2 <sup>nd</sup> -year surgical residents         | Vertebroplasty surgery, Simulation                       | Quantitative surveys, Objective observations or tests               | SURG-TLX                                     | To examine the impact of interruptions on resident surgeons’ CL and performance on simulated vertebroplasty                                                                                                                                                                                            | CL was higher and performance lower in disrupted scenario; Patient discomfort as source of disruption caused greater increase to CL than telephone call                                                                                                                                                                                                                |

Supplemental table B. Included studies.

|                              |                            |                                |                                                                                                                                                |                                                      |                                                       |                                                             |                                                                                                                                                                                                                                                                        |                                                                                                                                                                                   |
|------------------------------|----------------------------|--------------------------------|------------------------------------------------------------------------------------------------------------------------------------------------|------------------------------------------------------|-------------------------------------------------------|-------------------------------------------------------------|------------------------------------------------------------------------------------------------------------------------------------------------------------------------------------------------------------------------------------------------------------------------|-----------------------------------------------------------------------------------------------------------------------------------------------------------------------------------|
| Weinger 1994 <sup>102</sup>  | United States              | Quantitative, non-experimental | 11 1 <sup>st</sup> -year anesthesiology residents, 3 3 <sup>rd</sup> -year anesthesiology residents, 8 certified registered nurse anesthetists | Administering anesthesia, Workplace                  | Quantitative surveys, Objective observations or tests | Visual secondary task, Borg’s workload scale                | To develop and to validate objective techniques of CL measurement of anesthesiologists in an actual operating room environment, and to compare CL of novices and experienced anesthesiologists                                                                         | CL was higher in novices than experienced subjects; Subjective instrument correlated with visual secondary task                                                                   |
| Weinger 2000 <sup>103</sup>  | United States              | Quantitative, non-experimental | 33 anesthesiology residents, 10 certified registered nurse anesthetists, 83 attending anesthesiologists                                        | Airway management, Workplace                         | Quantitative surveys                                  | Investigator-developed multi-item instrument                | To measure the CL associated with 10 different airway management tasks among three levels of anesthesia providers                                                                                                                                                      | CL varied across the 10 tasks; CL did not differ by type or level of provider                                                                                                     |
| Wilson 2011 <sup>104</sup>   | China, United Kingdom      | Quantitative, non-experimental | 30 medical students                                                                                                                            | Laparoscopic tasks, Simulation                       | Quantitative surveys, Objective observations or tests | SURG-TLX                                                    | To develop and validate the SURG-TLX as a measure of CL among surgeons                                                                                                                                                                                                 | The results supported discriminant sensitivity of the SURG-TLX to different sources of stress                                                                                     |
| Workman 2007 <sup>105</sup>  | United States              | Quantitative, experimental     | 42 3 <sup>rd</sup> - and 4 <sup>th</sup> -year medical students, 3 board-certified intensivists                                                | Interpreting data in intensive care unit, Simulation | Objective observations or tests                       | Visual secondary task                                       | To determine whether a novel graphical format for information display (knowledge-enhanced graphical symbols, KEGS) would reduce CL and improve performance interpreting data in simulated critical care medicine setting, as compared with traditional textual display | CL was lower among medical students using KEGS versus traditional display; among attendings, CL was lower and accuracy higher using KEGS                                          |
| Wucherer 2015 <sup>106</sup> | Canada, Germany            | Quantitative, non-experimental | 19 “junior surgeons”                                                                                                                           | Vertebroplasty surgery, Simulation                   | Quantitative surveys, Objective observations or tests | NASA-TLX                                                    | To estimate CL among “junior surgeons” and assess for relationships with performance, during simulated surgical crisis setting compared with control simulation setting                                                                                                | CL was higher and work slower during crisis compared with control simulation                                                                                                      |
| Young 2010 <sup>107</sup>    | United States              | Quantitative, experimental     | 16 hypothetical psychiatry residents                                                                                                           | Ambulatory psychiatric care, Workplace               | Objective observations or tests                       | CL not measured                                             | To compare predicted ambulatory caseloads for incoming psychiatry residents a traditional model versus novel CL-based model                                                                                                                                            | CL-based model resulted in more evenly balanced patient panels with less inter-caseload variation                                                                                 |
| Young 2016 <sup>108</sup>    | Netherlands, United States | Quantitative, experimental     | 23 2 <sup>nd</sup> -year and 29 6 <sup>th</sup> -year medical students                                                                         | Patient handovers, Simulation                        | Quantitative surveys, Objective observations or tests | Paas’ Subjective Rating of Mental Effort single item scale  | To examine impact of simulated handover complexity on medical students’ CL and handover accuracy                                                                                                                                                                       | CL was negatively correlated with handover accuracy and illness script maturity (measure of experience); Illness script maturity was positively correlated with handover accuracy |
| Young, 2016 <sup>109</sup>   | Netherlands, United States | Quantitative, non-experimental | 54 2 <sup>nd</sup> -year and 33 3 <sup>rd</sup> -year medical students                                                                         | Patient handovers, Simulation                        | Quantitative surveys, Objective observations or tests | Paas’ Subjective Rating of Mental Effort single item scale, | To develop an instrument to measure subtypes of CL among medical students performing simulated handovers, and to assess for                                                                                                                                            | 2-factor model for CL developed including intrinsic and germane load; intrinsic load and germane load were higher in less experienced subjects;                                   |

Supplemental table B. Included studies.

|                            |                            |                                |                                                                                                                                                                                       |                                                                                    |                                                       |                                                                                                          |                                                                                                                                                                                                                                  |                                                                                                                                                                                                                                                    |
|----------------------------|----------------------------|--------------------------------|---------------------------------------------------------------------------------------------------------------------------------------------------------------------------------------|------------------------------------------------------------------------------------|-------------------------------------------------------|----------------------------------------------------------------------------------------------------------|----------------------------------------------------------------------------------------------------------------------------------------------------------------------------------------------------------------------------------|----------------------------------------------------------------------------------------------------------------------------------------------------------------------------------------------------------------------------------------------------|
|                            |                            |                                |                                                                                                                                                                                       |                                                                                    |                                                       | Investigator-developed multi-item instrument                                                             | relationships between intrinsic and germane load with experience level and performance                                                                                                                                           | No significant associations between CL and performance; Paas’ single item positively correlated with intrinsic but not germane load                                                                                                                |
| Young, 2016 <sup>110</sup> | Netherlands, United States | Quantitative, non-experimental | 23 2 <sup>nd</sup> -year and 29 6 <sup>th</sup> -year medical students                                                                                                                | Patient handovers, Simulation                                                      | Quantitative surveys                                  | Paas’ Subjective Rating of Mental Effort single item scale, Investigator-developed multi-item instrument | To provide evidence for validity of a revised instrument to measure CL during handovers, and to assess for relationships between CL, case complexity, and experience                                                             | Intrinsic and germane load formed a single factor, which was positively correlated with handover complexity and negatively correlated with experience                                                                                              |
| Yu, 2016 <sup>111</sup>    | United States              | Quantitative, non-experimental | 4 anesthesiologists, 12 certified registered nurse anesthetists, 38 circulating nurses, 35 surgical technicians, 26 surgical assistants, 45 surgical residents, 32 attending surgeons | Surgical operations, Workplace                                                     | Quantitative surveys, Objective observations or tests | SURG-TLX                                                                                                 | To quantify and compare CL among surgical team members across different surgical techniques and specialties                                                                                                                      | CL was highest among surgical residents (most novice team members); Ancillary staff (circulating nurse, surgical technician) had lowest CL; Surgical duration positively associated with overall team CL                                           |
| Yurko 2010 <sup>112</sup>  | United States              | Quantitative, non-experimental | 28 2 <sup>nd</sup> -year medical students and senior premedical students                                                                                                              | Laparoscopic suturing, Simulation                                                  | Quantitative surveys, Objective observations or tests | NASA-TLX                                                                                                 | To examine relationships between CL and performance among medical and premedical students performing simulated laparoscopic suturing, first on Fundamentals of Laparoscopic Surgery model, and then on transfer to porcine model | CL and performance were negatively correlated; Higher CL associated with more damage to porcine tissues; Performance increased and CL decreased on post-training testing, but then reversed on transfer to a porcine model                         |
| Zheng 2010 <sup>113</sup>  | Canada                     | Quantitative, non-experimental | 12 surgical residents, 9 surgical fellows and attendings                                                                                                                              | Laparoscopic tasks, Simulation                                                     | Objective observations or tests                       | Visual secondary task                                                                                    | To compare CL and performance while performing simulated laparoscopic tasks among experienced versus novice laparoscopic surgeons                                                                                                | Experienced surgeons had lower CL and better performance than novice surgeons                                                                                                                                                                      |
| Zheng 2012 <sup>114</sup>  | Canada                     | Quantitative, experimental     | 5 novice and 5 expert surgeons                                                                                                                                                        | Laparoscopic and natural orifice transluminal endoscopic surgery tasks, Simulation | Objective observations or tests                       | NASA-TLX, Visual secondary task                                                                          | To compare CL and performance among novice and expert surgeons performing simulated laparoscopic and natural orifice transluminal endoscopic surgery (NOTES)                                                                     | CL was higher in NOTES versus laparoscopic procedures (based on secondary task, but not based on NASA-TLX) but this was attenuated by prior experience; Performance lower in NOTES procedures and higher among those with greater prior experience |

**Supplemental table B. Included studies.**

|                           |        |                                |                                                                      |                                          |                                                       |                        |                                                                                                                                                             |                                                                                                                                                                                                              |
|---------------------------|--------|--------------------------------|----------------------------------------------------------------------|------------------------------------------|-------------------------------------------------------|------------------------|-------------------------------------------------------------------------------------------------------------------------------------------------------------|--------------------------------------------------------------------------------------------------------------------------------------------------------------------------------------------------------------|
| Zheng 2012 <sup>115</sup> | Canada | Quantitative, non-experimental | 23 surgical residents, fellows, and attendings                       | Laparoscopic cholecystectomy, Simulation | Quantitative surveys, Objective observations or tests | NASA-TLX, Eye tracking | To correlate eye tracking and NASA-TLX as means to estimate CL during simulated laparoscopic cholecystectomy                                                | Higher CL was associated with fewer blinks and shorter blink duration; Performance did not vary with eye tracking data                                                                                       |
| Zheng 2014 <sup>116</sup> | Canada | Quantitative, experimental     | 12 surgical residents, 3 laparoscopic fellows, 2 surgical attendings | Using surgical instruments, Simulation   | Quantitative surveys, Objective observations or tests | NASA-TLX               | To examine how complexity (open versus laparoscopic versus endoscopic approach) impacts surgeons' CL and performance during simulated use of surgical tools | CL was higher in most complex approach (endoscopic) versus least complex approach (open); Time to complete task higher in more complex approaches; With practice, performance improved but CL did not change |

Abbreviations: CL, cognitive load; EEG, electroencephalogram; EMG, electromyography; LF/HF, low frequency/high frequency (higher ratio suggests higher sympathetic tone and higher CL); NASA-TLX, NASA Task Load Index; SURG-TLX, Surgery Task Load Index

<sup>a</sup>Description of participants is provided using the level of detail included in each study manuscript.

<sup>b</sup>For consistency and ease of table interpretation, we use the term CL (cognitive load) when referring to the constructs of cognitive load, mental effort, and mental workload.

**REFERENCES FOR SUPPLEMENTAL TABLE B**

1. Andersen SA, Mikkelsen PT, Konge L, Caye-Thomasen P, Sorensen MS. Cognitive load in distributed and massed practice in virtual reality mastoidectomy simulation. *Laryngoscope*. 2015;126:E74-E79.
2. Andersen SA, Mikkelsen PT, Konge L, Cayé-Thomasen P, Sørensen M. Cognitive Load in Mastoidectomy Skills Training: Virtual Reality Simulation and Traditional Dissection Compared. *J Surg Educ*. 2016;73(1):45-50.
3. Andersen SA, Konge L, Cayé-Thomasen P, Sørensen MS. Retention of mastoidectomy skills after virtual reality simulation training. *JAMA Otolaryngol Head Neck Surg*. 2016;142(7):635-640.
4. Andrade AD, Cifuentes P, Mintzer MJ, Roos BA, Anam R, Ruiz JG. Simulating Geriatric Home Safety Assessments in a Three-Dimensional Virtual World. *Gerontol Geriatr Educ*. 2012;33(3):233-252.
5. Arico P, Borghini G, Di Flumeri G, et al. Adaptive Automation Triggered by EEG-Based Mental Workload Index: A Passive Brain-Computer Interface Application in Realistic Air Traffic Control Environment. *Front Hum Neurosci*. 2016;10:539.
6. Attrill S, Lincoln M, McAllister S. Supervising international students in clinical placements: perceptions of experiences and factors influencing competency development. *BMC Med Educ*. 2016;16:180.
7. Avansino J, Leu MG. Effects of CPOE on provider cognitive workload: A randomized crossover trial. *Pediatrics*. 2012;130(3):e547-e552.
8. Bertram DA, Hershey CO, Opila DA, Quirin O. A measure of physician mental work load in internal medicine ambulatory care clinics. *Med Care*. 1990;28(5):458-467.
9. Bertram DA, Opila DA, Brown JL, et al. Measuring physician mental workload: reliability and validity assessment of a brief instrument. *Med Care*. 1992;30(2):95-104.
10. Bharathan R, Vali S, Setchell T, Miskry T, Darzi A, Aggarwal R. Psychomotor skills and cognitive load training on a virtual reality laparoscopic simulator for tubal surgery is effective. *Eur J Obstet Gynecol Reprod Biol*. 2013;169(2):347-352.
11. Blissett S, Morrison D, McCarty D, Sibbald M. Should learners reason one step at a time? A randomised trial of two diagnostic scheme designs. *Med Educ*. 2017;51(4):432-441.
12. Boet S, Sharma B, Pigford AA, Hladkowicz E, Rittenhouse N, Grantcharov T. Debriefing decreases mental workload in surgical crisis: A randomized controlled trial. *Surgery*. 2017;161(5):1215-1220.
13. Britt RC, Scerbo MW, Montano M, Kennedy RA, Prytz E, Stefanidis D. Intracorporeal suturing: Transfer from Fundamentals of Laparoscopic Surgery to cadavers results in substantial increase in mental workload. *Surgery*. 2015;158(5):1428-1433.
14. Broyles TW, Epler CM, Waknine JW. A case study examining the impact of cognitive load on reflection and pre-service teachers' transfer of specific teaching behaviors. *Career and Technical Education Research*. 2011;36(1):49-66.
15. Byrne AJ, Sellen AJ, Jones JG. Errors on anaesthetic record charts as a measure of anaesthetic performance during simulated critical incidents. *Br J Anaesth*. 1998;80(1):58-62.
16. Byrne AJ, Murphy A, McIntyre O, Tweed N. The relationship between experience and mental workload in anaesthetic practice: an observational study. *Anaesthesia*. 2013;68(12):1266-1272.
17. Cao CGL, Zhou M, Jones DB, Schwaitzberg SD. Can surgeons think and operate with haptics at the same time? *J Gastrointest Surg*. 2007;11(11):1564-1569.

**Supplemental table B. Included studies.**

18. Chen R, Grierson LE, Norman GR. Evaluating the impact of high- and low-fidelity instruction in the development of auscultation skills. *Med Educ*. 2015;49(3):276-285.
19. Chen R, Grierson L, Norman G. Manipulation of cognitive load variables and impact on auscultation test performance. *Adv Health Sci Educ Theory Pract*. 2015;20(4):935-952.
20. Chowriappa A, Raza SJ, Fazili A, et al. Augmented-reality-based skills training for robot-assisted urethrovesical anastomosis: A multi-institutional randomised controlled trial. *BJU Int*. 2015;115(2):336-345.
21. Chui MA, Stone JA. Exploring information chaos in community pharmacy handoffs. *Res Social Adm Pharm*. 2014;10(1):195-203.
22. Crosby JJ, Parkinson SR. A dual task investigation of pilots' skill level. *Ergonomics*. 1979;22(12):1301-1313.
23. Cummings ML, Smith CA. Improving precision vertical flight operations through a direct-perception-action display. *Journal of Aircraft*. 2009;46(4):1270-1279.
24. Dahlstrom N, Nahlinder S. Mental workload in aircraft and simulator during basic civil aviation training. *International Journal of Aviation Psychology*. 2009;19(4):309-325.
25. Dankbaar ME, Alsma J, Jansen EE, van Merrienboer JJ, van Saase JL, Schuit SC. An experimental study on the effects of a simulation game on students' clinical cognitive skills and motivation. *Adv Health Sci Educ Theory Pract*. 2016;21(3):505-521.
26. Davis DHJ, Oliver M, Byrne AJ. A novel method of measuring the mental workload of anaesthetists during simulated practice. *Br J Anaesth*. 2009;103(5):665-669.
27. de Man FR, Erwtaman M, van Groeningen D, et al. The effect of audible alarms on anaesthesiologists' response times to adverse events in a simulated anaesthesia environment: a randomised trial. *Anaesthesia*. 2014;69(6):598-603.
28. Di Stasi LL, Díaz-Piedra C, Ruiz-Rabelo JF, Rieiro H, Sanchez Carrion JM, Catena A. Quantifying the cognitive cost of laparo-endoscopic single-site surgeries: Gaze-based indices. *Appl Ergon*. 2017;65:168-174.
29. Doig AK, Albert RW, Syroid ND, Moon S, Agutter JA. Graphical arterial blood gas visualization tool supports rapid and accurate data interpretation. *Comput Inform Nurs*. 2011;29(4 Suppl):TC53-60.
30. Dominessy ME, Lukas JH, Malkin FJ, Monty RA, Oatman LC. The effect of information display formats on helicopter pilots' target acquisition and flying performance. *Mil Psychol*. 1991;3(3):163-176.
31. Donato AA, Kaliyadan AG, Wasser T. Self-directed study using MP3 players to improve auscultation proficiency of physicians: a randomized, controlled trial. *J Contin Educ Health Prof*. 2014;34(2):131-138.
32. Durning SJ, Artino AR, Boulet JR, Dorrance K, van der Vleuten C, Schuwirth L. The impact of selected contextual factors on experts' clinical reasoning performance (does context impact clinical reasoning performance in experts?). *Adv Health Sci Educ Theory Pract*. 2012;17(1):65-79.
33. Durning S, Artino AR, Jr., Pangaro L, van der Vleuten CP, Schuwirth L. Context and clinical reasoning: understanding the perspective of the expert's voice. *Med Educ*. 2011;45(9):927-938.
34. Fenik Y, Celebi N, Wagner R, et al. Prepackaged central line kits reduce procedural mistakes during central line insertion: a randomized controlled prospective trial. *BMC Med Educ*. 2013;13:60.
35. Flindall IR, Leff DR, Pucks N, Sugden C, Darzi A. The Preservation of Cued Recall in the Acute Mentally Fatigued State: A Randomised Crossover Study. *World J Surg*. 2016;40:56-65.
36. Fraser K, Ma I, Teteris E, Baxter H, Wright B, McLaughlin K. Emotion, cognitive load and learning outcomes during simulation training. *Med Educ*. 2012;46(11):1055-1062.
37. Fraser K, Huffman J, Ma I, et al. The emotional and cognitive impact of unexpected simulated patient death: a randomized controlled trial. *Chest*. 2014;145(5):958-963.
38. Gaba DM, Lee T. Measuring the workload of the anesthesiologist. *Anesth Analg*. 1990;71(4):354-361.
39. Gardner AK, Clanton J, Jabbour, II, Scott L, Scott DJ, Russo MA. Impact of seductive details on the acquisition and transfer of laparoscopic suturing skills: Emotionally interesting or cognitively taxing? *Surgery*. 2016;160(3):580-585.
40. Guru KA, Esfahani ET, Raza SJ, et al. Cognitive skills assessment during robot-assisted surgery: separating the wheat from the chaff. *BJU Int*. 2015;115(1):166-174.
41. Haji FA, Khan R, Regehr G, Drake J, de Ribaupierre S, Dubrowski A. Measuring cognitive load during simulation-based psychomotor skills training: sensitivity of secondary-task performance and subjective ratings. *Adv Health Sci Educ Theory Pract*. 2015;20(5):1237-1253.
42. Haji FA, Rojas D, Childs R, Ribaupierre S, Dubrowski A. Measuring cognitive load: performance, mental effort and simulation task complexity. *Med Educ*. 2015;49(8):815-827.
43. Haji FA, Cheung JJ, Woods N, Regehr G, de Ribaupierre S, Dubrowski A. Thrive or overload? The effect of task complexity on novices' simulation-based learning. *Med Educ*. 2016;50(9):955-968.
44. Hautz WE, Schroder T, Dannenberg KA, et al. Shame in Medical Education: A Randomized Study of the Acquisition of Intimate Examination Skills and Its Effect on Subsequent Performance. *Teach Learn Med*. 2017;29(2):196-206.
45. Hsieh MH, Hwang SL, Liu KH, Liang SFM, Chuang CF. A decision support system for identifying abnormal operating procedures in a nuclear power plant. *Nuclear Engineering and Design*. 2012;249:413-418.
46. Hsu CK, Lin SC, Li WC. Visual movement and mental-workload for pilot performance assessment. *Lecture Notes in Computer Science*. 2015;9174:356-364.

**Supplemental table B. Included studies.**

47. Hu JS, Lu J, Tan WB, Lomanto D. Training improves laparoscopic tasks performance and decreases operator workload. *Surg Endosc.* 2015;30:1742-1746.
48. Hussein AA, Shafiei SB, Sharif M, et al. Technical Mentorship during Robot-Assisted Surgery: A Cognitive Analysis? *BJU Int.* 2016;118(3):429-436.
49. Jayaprakash N, Ali R, Kashyap R, Bennett C, Kogan A, Gajic O. The incorporation of focused history in checklist for early recognition and treatment of acute illness and injury. *BMC Emerg Med.* 2016;16(1):35.
50. Jutric Z, Grendar J, Brown WL, et al. Novel Simulation Device for Targeting Tumors in Laparoscopic Ablation: A Learning Curve Study. *Surg Innov.* 2017;24(5):492-498.
51. Kataoka J, Sasaki M, Kanda K. Effects of mental workload on nurses' visual behaviors during infusion pump operation. *Jpn J Nurs Sci.* 2011;8(1):47-56.
52. Klein MI, Lio CH, Grant R, Carswell CM, Strup S. A mental workload study on the 2d and 3d viewing conditions of the da Vinci surgical robot. *Proceedings of the Human Factors and Ergonomics Society 53rd Annual Meeting.* 2009;2:1186-1190.
53. Klein MI, Warm JS, Riley MA, et al. Mental workload and stress perceived by novice operators in the laparoscopic and robotic minimally invasive surgical interfaces. *J Endourol.* 2012;26(8):1089-1094.
54. Lee GI, Lee MR, Clanton T, Sutton E, Park AE, Marohn MR. Comparative assessment of physical and cognitive ergonomics associated with robotic and traditional laparoscopic surgeries. *Surg Endosc.* 2014;28(2):456-465.
55. Lee MH, Schemmel AJ, Pooler BD, et al. Radiology Workflow Dynamics: How Workflow Patterns Impact Radiologist Perceptions of Workplace Satisfaction. *Acad Radiol.* 2017;24(4):483-487.
56. Lee GI, Lee MR. Can a virtual reality surgical simulation training provide a self-driven and mentor-free skills learning? Investigation of the practical influence of the performance metrics from the virtual reality robotic surgery simulator on the skill learning and associated cognitive workloads. *Surg Endosc.* 2018;32(1):62-72.
57. Liang GF, Lin JT, Hwang SL, Wang EM, Patterson P. Preventing human errors in aviation maintenance using an on-line maintenance assistance platform. *International Journal of Industrial Ergonomics.* 2010;40(3):356-367.
58. Lowndes B, Abdelrahman A, McCrory B, Hallbeck S. A Preliminary Study of Novice Workload and Performance During Surgical Simulation Tasks for Conventional vs. Single Incision Laparoscopic Techniques. *Proceedings of the Human Factors and Ergonomics Society 59th Annual Meeting.* 2015:498-502.
59. Maxwell DZ, J. Large Scale Testing and Evaluation of Virtual Environments for Infantry Soldier Tasks Comparing Mental Effort for Live Versus Virtual Training Performance Assessments. *MODSIM World 2017*; April 25-27, 2017; Virginia Beach, VA.
60. Mazur LM, Mosaly PR, Hoyle LM, Jones EL, Chera BS, Marks LB. Relating physician's workload with errors during radiation therapy planning. *Pract Radiat Oncol.* 2014;4(2):71-75.
61. Modi H, Leff D, Singh H, Darzi A. The influence of cognitive load on technical ability among surgical trainees. *Int J Surg.* 2016;36:S34-S35.
62. Mohamed R, Raman M, Anderson J, McLaughlin K, Rostom A, Coderre S. Validation of the National Aeronautics and Space Administration Task Load Index as a tool to evaluate the learning curve for endoscopy training. *Can J Gastroenterol Hepatol.* 2014;28(3):155-159.
63. Montero PN, Acker CE, Heniford BT, Stefanidis D. Single incision laparoscopic surgery (SILS) is associated with poorer performance and increased surgeon workload compared with standard laparoscopy. *Am Surg.* 2011;77(1):73-77.
64. Moore LJ, Wilson MR, McGrath JS, Waine E, Masters RSW, Vine SJ. Surgeons' display reduced mental effort and workload while performing robotically assisted surgical tasks, when compared to conventional laparoscopy. *Surg Endosc.* 2015;29(9):2553-2560.
65. Moos DC, Pitton D. Student Teacher Challenges: Using the Cognitive Load Theory as an Explanatory Lens. *Teaching Education.* 2014;25(2):127-141.
66. Morris CH, Leung YK. Pilot mental workload: how well do pilots really perform? *Ergonomics.* 2006;49(15):1581-1596.
67. Mouraviev V, Klein M, Schommer E, et al. Urology residents experience comparable workload profiles when performing live porcine nephrectomies and robotic surgery virtual reality training modules. *J Robot Surg.* 2016;10(1):49-56.
68. Mulcock PM, Grassley J, Davis M, White K. Beyond the Dedicated Education Unit: Using Cognitive Load Theory to Guide Clinical Placement. *J Nurs Educ.* 2017;56(2):105-109.
69. Murai K, Ishikura A, Hayashi Y, et al. Toward evaluation of ship bridge teamwork for marine simulator training based on heart rate variability. *World Automation Congress.* 2010:1-6.
70. Muresan III C, Lee TH, Seagull J, Park AE. Transfer of training in the development of intracorporeal suturing skill in medical student novices: A prospective randomized trial. *Am J Surg.* 2010;200(4):537-541.
71. Naismith LM, Cheung JJH, Ringsted C, Cavalcanti RB. Limitations of subjective cognitive load measures in simulation-based procedural training. *Med Educ.* 2015;48(8):805-814.
72. Rojas D, Haji F, Shewaga R, Kapralos B, Dubrowski A. The impact of secondary-task type on the sensitivity of reaction-time based measurement of cognitive load for novices learning surgical skills using simulation. *Stud Health Technol Inform.* 2014;196:353-359.

**Supplemental table B. Included studies.**

73. Saleem JJ, Patterson ES, Militello L, et al. Impact of clinical reminder redesign on learnability, efficiency, usability, and workload for ambulatory clinic nurses. *J Am Med Inform Assoc.* 2007;14(5):632-640.
74. Sato H, Miyashita T, Kawakami H, Nagamine Y, Takaki S, Goto T. Influence of Mental Workload on the Performance of Anesthesiologists during Induction of General Anesthesia: A Patient Simulator Study. *BioMed Research International.* 2016;2016:1058750.
75. Saus E, Johnsen BH, Eid J, Riisem PK, Andersen R, Thayer JF. The effect of brief situational awareness training in a police shooting simulator: an experimental study. *Mil Psychol.* 2006;18(Suppl):S3-S21.
76. Saus E, Johnsen BH, Eid J. Perceived learning outcome: the relationship between experience, realism and situation awareness during simulator training. *Int Marit Health.* 2010;62(4):258-264.
77. Scerbo MW, Kennedy A, Montano M, Britt RC, Davis SS, Stefanidis D. A Spatial Secondary Task for Measuring Laparoscopic Mental Workload: Differences in Surgical Experience. *Proceedings of the Human Factors and Ergonomics Society 57th Annual Meeting.* 2013:728-732.
78. Scerbo MW, Britt RC, Stefanidis D. Differences in mental workload between traditional and single-incision laparoscopic procedures measured with a secondary task. *Am J Surg.* 2017;213(2):244-248.
79. Scerbo MW, Britt RC, Montano M, Kennedy RA, Prytz E, Stefanidis D. Effects of a retention interval and refresher session on intracorporeal suturing and knot tying skill and mental workload. *Surgery.* 2017;161(5):1209-1214.
80. Seidelman W, Carswell CM, Lio CH, et al. Potential performance costs associated with large-format tiled displays for surgical visualization. *Proceedings of the Human Factors and Ergonomics Society 54th Annual Meeting.* 2010;2:1430-1434.
81. Sewell JL, Boscardin CK, Young JQ, ten Cate O, O'Sullivan PS. Measuring cognitive load during procedural skills training with colonoscopy as an exemplar. *Med Educ.* 2016;50(6):682-692.
82. Sewell JL, Boscardin CK, Young JQ, ten Cate O, O'Sullivan PS. Learner, Patient, and Supervisor Features Are Associated With Different Types of Cognitive Load During Procedural Skills Training: Implications for Teaching and Instructional Design. *Acad Med.* 2017;92(11):1622-1631.
83. Sexton K, Johnson A, Gotsch A, Hussein AA, Cavuoto L, Guru KA. Anticipation, teamwork and cognitive load: chasing efficiency during robot-assisted surgery. *BMJ Qual Saf.* 2018;27(2):148-154.
84. Shachak A, Hadas-Dayagi M, Ziv A, Reis S. Primary care physicians' use of an electronic medical record system: a cognitive task analysis. *J Gen Intern Med.* 2009;24(3):341-348.
85. Shewokis PA, Shariff FU, Liu Y, Ayaz H, Castellanos A, Lind DS. Acquisition, retention and transfer of simulated laparoscopic tasks using fNIR and a contextual interference paradigm. *Am J Surg.* 2017;213(2):336-345.
86. Sibbald M, de Bruin AB, Cavalcanti RB, van Merrienboer JIG. Do you have to re-examine to reconsider your diagnosis? Checklists and cardiac exam. *BMJ Qual Saf.* 2013;22(4):333-338.
87. Sibbald M, de Bruin ABH, van Merrienboer JIG. Checklists improve experts' diagnostic decisions. *Med Educ.* 2013;47(3):301-308.
88. Stefanidis D, Wang F, Korndorffer JR, Jr., Dunne JB, Scott DJ. Robotic assistance improves intracorporeal suturing performance and safety in the operating room while decreasing operator workload. *Surg Endosc.* 2010;24(2):377-382.
89. Strang AJ, Best C, Funke GJ. Heart rate correlates of mental workload in a large-scale air-combat simulation training exercise. *Proceedings of the Human Factors and Ergonomics Society 58th Annual Meeting.* 2014:2325-2329.
90. Svensson E, Angelborg-Thanderz M, Sjöberg L. Mission challenge, mental workload and performance in military aviation. *Aviat Space Environ Med.* 1993;64(11):985-991.
91. Szulewski A, Howes D. Combining first-person video and gaze-tracking in medical simulation: A technical feasibility study. *The Scientific World Journal.* 2014;2014(975752):eCollection 2014.
92. Tattersall AJ, Hockey GRJ. Level of operator control and changes in heart rate variability during simulated flight maintenance. *Hum Factors.* 1995;37(4):682-698.
93. Teel S, Sanders J, Parrott DS, et al. Evaluation of marine simulator training based on heart rate variability. *Proceedings of the 2009 IEEE International Conference on Systems, Man and Cybernetics.* 2009:233-238.
94. Theodoraki MN, Ledderose GJ, Becker S, et al. Mental distress and effort to engage an image-guided navigation system in the surgical training of endoscopic sinus surgery: a prospective, randomised clinical trial. *Eur Arch Otorhinolaryngol.* 2015;272(4):905-913.
95. Thomas L, Donohue-Porter P, Stein Fishbein J. Impact of Interruptions, Distractions, and Cognitive Load on Procedure Failures and Medication Administration Errors. *J Nurs Care Qual.* 2017;32(4):309-317.
96. Tien T, Pucher PH, Sodergren MH, Sriskandarajah K, Yang GZ, Darzi A. Differences in gaze behaviour of expert and junior surgeons performing open inguinal hernia repair. *Surg Endosc.* 2015;29(2):405-413.
97. Tomasko JM, Pauli EM, Kunselman AR, Haluck RS. Sleep deprivation increases cognitive workload during simulated surgical tasks. *Am J Surg.* 2012;203(1):37-43.
98. Tremblay ML, Lafleur A, Leppink J, Dolmans DH. The simulated clinical environment: Cognitive and emotional impact among undergraduates. *Med Teach.* 2017;39(2):181-187.
99. Walker J, von Bergmann H. Lessons from a pilot project in cognitive task analysis: the potential role of intermediates in preclinical teaching in dental education. *J Dent Educ.* 2015;79(3):286-294.

**Supplemental table B. Included studies.**

100. Weigl M, Antoniadis S, Chiapponi C, Bruns C, Sevdalis N. The impact of intra-operative interruptions on surgeons' perceived workload: an observational study in elective general and orthopedic surgery. *Surg Endosc.* 2015;29(1):145-153.
101. Weigl M, Stefan P, Abhari K, et al. Intra-operative disruptions, surgeon's mental workload, and technical performance in a full-scale simulated procedure. *Surg Endosc.* 2016;30(2):559-566.
102. Weinger MB, Herndon OW, Zornow MH, Paulus MP, Gaba DM, Dallen LT. An objective methodology for task analysis and workload assessment in anesthesia providers. *Anesthesiology.* 1994;80(1):77-92.
103. Weinger MB, Vredenburg AG, Schumann CM, et al. Quantitative description of the workload associated with airway management procedures. *J Clin Anesth.* 2000;12(4):273-282.
104. Wilson MR, Poolton JM, Malhotra N, Ngo K, Bright E, Masters RS. Development and validation of a surgical workload measure: the surgery task load index (SURG-TLX). *World J Surg.* 2011;35(9):1961-1969.
105. Workman M, Lesser MF, Kim J. An exploratory study of cognitive load in diagnosing patient conditions. *Int J Qual Health Care.* 2007;19(3):127-133.
106. Wucherer P, Stefan P, Abhari K, et al. Vertebroplasty Performance on Simulator for 19 Surgeons Using Hierarchical Task Analysis. *IEEE Trans Med Imaging.* 2015;34(8):1730-1737.
107. Young JQ, Niehaus B, Lieu SC, O'Sullivan PS. Improving resident education and patient safety: a method to balance initial caseloads at academic year-end transfer. *Acad Med.* 2010;85(9):1418-1424.
108. Young JQ, van Dijk SM, O'Sullivan PS, Custers EJ, Irby DM, Ten Cate O. Influence of learner knowledge and case complexity on handover accuracy and cognitive load: results from a simulation study. *Med Educ.* 2016;50(9):969-978.
109. Young JQ, Irby DM, Barilla-LaBarca ML, Ten Cate O, O'Sullivan PS. Measuring cognitive load: mixed results from a handover simulation for medical students. *Perspect Med Educ.* 2016;5(1):24-32.
110. Young JQ, Boscardin CK, van Dijk SM, et al. Performance of a cognitive load inventory during simulated handoffs: Evidence for validity. *SAGE Open Med.* 2016;4:2050312116682254.
111. Yu D, Lowndes B, Thiels C, et al. Quantifying Intraoperative Workloads Across the Surgical Team Roles: Room for Better Balance? *World J Surg.* 2016;40(7):1565-1574.
112. Yurko YY, Scerbo MW, Prabhu AS, Acker CE, Stefanidis D. Higher mental workload is associated with poorer laparoscopic performance as measured by the NASA-TLX tool. *Simul Healthc.* 2010;5(5):267-271.
113. Zheng B, Cassera MA, Martinec DV, Spaun GO, Swanström LL. Measuring mental workload during the performance of advanced laparoscopic tasks. *Surg Endosc.* 2010;24(1):45-50.
114. Zheng B, Rieder E, Cassera MA, et al. Quantifying mental workloads of surgeons performing natural orifice transluminal endoscopic surgery (NOTES) procedures. *Surg Endosc.* 2012;26(5):1352-1358.
115. Zheng B, Jiang X, Tien G, Meneghetti A, Panton ONM, Atkins MS. Workload assessment of surgeons: Correlation between NASA TLX and blinks. *Surg Endosc.* 2012;26(10):2746-2750.
116. Zheng B, Fu B, Al-Tayeb TA, Hao YF, Qayumi AK. Mastering instruments before operating on a patient: the role of simulation training in tool use skills. *Surg Innov.* 2014;21(6):637-642.
