# Supplementary material
Source: publisher figshare collection journal article supplement (https://tandf.figshare.com/articles/dataset/_/7218281)
Supplement: Supplementary file 2 [file 1 › imte_a_1505034_sm8395.docx]

**Table 3. Practical suggestions for ‘best practices’ to optimize cognitive load in health professions workplaces resulting from this review.**

| **Best practices** | **Evidence** | **Practical suggestions** |
| --- | --- | --- |
| **Curricular Design** |  |  |
| Ensure overall CL or intrinsic load of individual learning settings are not *too high* | Performance negatively associated with intrinsic load and overall CL in numerous studies, implying reduced learning when these are too high  If intrinsic or overall CL is too high, space for activities contributing to germane load will be limited | - Minimize task complexity for early learners (e.g., partial task, worked examples) ([Chen HC et al. 2015](#_ENREF_16)) - Minimize task complexity when introducing new technologies or methods by providing time, develop a stepwise process - Monitor learners’ competence to know when to increase complexity - Scaffold and sequence curriculum to gradually increase complexity over time - Use 4C/ID approach to design individual teaching sessions ([Vandewaetere et al. 2015](#_ENREF_109)) - Systematically assign patients based on competence ([Young et al. 2010](#_ENREF_118)) |
| Ensure overall CL or intrinsic load of individual learning settings are not *too low* | Higher complexity tasks associated with higher intrinsic *and* higher germane load among more advanced learners ([Dankbaar et al. 2016](#_ENREF_24))  No studies specifically investigated cases in which intrinsic load might be too low, but this could plausibly occur, inducing expertise reversal effect ([Kalyuga et al. 2003](#_ENREF_52)) | - As above |
| Use simulation for early learners, especially when actual tasks involve potential for patient risk and/or have significant element interactivity | Simulation enables control over complexity and deliberate practice ([Ericsson 2004](#_ENREF_32)), which should enhance learning  Lower complexity simulation associated with lower CL and better performance (proxy for learning) among novice learners ([Chen R et al. 2015](#_ENREF_18)b; [Haji, Rojas, et al. 2015](#_ENREF_44); [Tremblay et al. 2017](#_ENREF_107))  Studies did not compare simulation with actual patient care | - For procedural skills, build basic skills with simulator, then when competence demonstrated, begin to work with real patients (see: Learn, See, Practice, Prove, Do, Maintain approach ([Sawyer et al. 2015](#_ENREF_90))) - For cognitive skills, start with simple paper-based cases and then increase complexity of simulation before working with real patients - Monitor lag between training and actual use of skills; may need to plan for practice to bring skills back up to prior level of training |
| Appraise all aspects of workplaces and associated tasks to identify areas with high potential for cognitive overload | Specific portions of workplace tasks were associated with different levels of CL ([Gaba and Lee 1990](#_ENREF_38); [Weinger et al. 2000](#_ENREF_113); [Dahlstrom and Nahlinder 2009](#_ENREF_23); [Shachak et al. 2009](#_ENREF_95); [Murai et al. 2010](#_ENREF_79); [Moos and Pitton 2014](#_ENREF_74); [Walker and von Bergmann 2015](#_ENREF_110)) | - Use cognitive task analysis to identify complex areas ([Walker and von Bergmann 2015](#_ENREF_110); [Young, Ten Cate, et al. 2016](#_ENREF_120)) - Orient learners to whole task but allow part task practice until able to accomplish entire task, i.e., 4C/ID ([Vandewaetere et al. 2015](#_ENREF_109)) |
| Standardize common tasks, providing supports when needed | Checklists and diagnostic aids reduced CL and improved performance ([Liang et al. 2010](#_ENREF_64); [Sibbald, de Bruin, Cavalcanti, et al. 2013](#_ENREF_97); [Sibbald, de Bruin, van Merrienboer 2013](#_ENREF_98)) | - Use checklists or standard protocols for common, complex, high-risk activities such as patient hand-offs |
| Design curricula to support workplace learning that scaffold tasks, gradually increasing complexity and reducing support | No curricular studies were identified, but indirectly supported by studies noted earlier in this table, and commentaries suggest benefit ([Leppink and Duvivier 2016](#_ENREF_61)) | - Consider how workplace rotation schedule and didactic teaching can be used to scaffold learning for critical tasks ([Chen HC et al. 2015](#_ENREF_16)) |
| Facilitate mixed or random practice over block practice | Lower CL and better performance with mixed or random practice compared with block practice ([Chen R et al. 2015](#_ENREF_17)a; [Shewokis et al. 2017](#_ENREF_96)) | - Integrate skills sessions throughout a curriculum that involve a mixed or random set of cases or diagnoses |
| **Direct Teaching** |  |  |
| Teacher should remain engaged with learning, limiting tangential conversations | Greater teacher engagement associated with higher germane load and lower extraneous load ([Sewell et al. 2017](#_ENREF_93))  Tangential conversations associated with higher CL, lower performance ([Gardner et al. 2016](#_ENREF_39)) | - Regularly evaluate teachers’ performance and provide constructive feedback - Provide faculty development for teaching engagement techniques, including minimizing tangential conversations which may not over-tax experts but can overload less experienced trainees - Minimize competing duties and distractions for clinical faculty when they are working with learners in the workplace |
| Teach teachers to monitor for cognitive overload in learners | Although no studies addressed this, teachers are in unique position to observe learners’ behavior for cues suggestive of cognitive overload | - Observe learners’ body language and utterances for hints of cognitive overload and adjust teaching and level of support accordingly |
| Attend to learner emotion, especially in crisis situations | Negative emotions negatively affected learning ([Fraser K et al. 2012](#_ENREF_36); [Fraser K et al. 2014](#_ENREF_35))  Crisis situations were associated with higher levels of CL and lower performance ([Davis et al. 2009](#_ENREF_25); [Fraser K et al. 2014](#_ENREF_35); [Wucherer et al. 2015](#_ENREF_115); [Boet et al. 2017](#_ENREF_12)); debriefing may help ([Boet et al. 2017](#_ENREF_12)) | - Debrief after crisis situations - Provide faculty development to help faculty recognize learner emotions and to manage crisis situations and debriefing - When learners display external evidence of negative emotions, discuss with them and facilitate reflection, providing supportive services when needed |
| **Learning Environment** |  |  |
| Leverage graphical displays and technology to reduce extraneous load | Graphical representations of complex data were associated with lower CL and better performance ([Dominessy et al. 1991](#_ENREF_28); [Workman et al. 2007](#_ENREF_114); [Doig et al. 2011](#_ENREF_27))  Well-designed electronic interfaces (e.g., order sets) were associated with lower CL and better performance ([Saleem et al. 2007](#_ENREF_87); [Avansino and Leu 2012](#_ENREF_7))  Consistent with Cognitive Theory of Multimedia Learning ([Mayer 2009](#_ENREF_67)) | - Critically evaluate tools learners use in clinical settings, optimizing or changing products and interfaces when needed - Thoroughly orient learners to best uses of technology in the workplace – mixed approaches may be most beneficial ([Maxwell 2017](#_ENREF_66)) - Seek learner input for modifiable electronic health record-related tools such as note templates, order sets, and boilerplate phrases |
| Monitor learning environments for complexity, distractions, and contextual factors that may induce cognitive overload | More complex simulated environments increased extraneous load and decreased performance in novices ([Tremblay et al. 2017](#_ENREF_107))  Contextual factors increased cognitive load and reduced performance, even in experienced physicians ([Durning SJ et al. 2012](#_ENREF_31)) | - Critically evaluate workspace and workflow, considering aspects that can be improved to reduce distractions and other sources of extraneous load |
| Engineer workplace environments to minimize distractions and redundancy | Re-engineered workplace reduced disruptions, lowered CL, and increased satisfaction ([Lee MH et al. 2017](#_ENREF_60)) | - Ask learners what challenges they face in the physical work environment - Involve learners in environment change, possibly as quality improvement effort |
| Monitor for, and mitigate, learner fatigue | Fatigue was positively associated with extraneous load and overall CL ([Bertram et al. 1990](#_ENREF_9); [Bertram et al. 1992](#_ENREF_10); [Sewell et al. 2017](#_ENREF_93)) | - Proactively identify learning settings in which fatigue is common - Adjust tasks, schedules and support to mitigate effects of fatigue on CL |
| **Metacognition** |  |  |
| Help learners know where to direct their limited working memory resources | Specific portions of workplace tasks were associated with different levels of CL ([Gaba and Lee 1990](#_ENREF_38); [Weinger et al. 2000](#_ENREF_113); [Dahlstrom and Nahlinder 2009](#_ENREF_23); [Shachak et al. 2009](#_ENREF_95); [Murai et al. 2010](#_ENREF_79); [Moos and Pitton 2014](#_ENREF_74); [Walker and von Bergmann 2015](#_ENREF_110)) | - Deconstruct whole tasks into partial tasks, i.e., 4C/ID ([Vandewaetere et al. 2015](#_ENREF_109)), and prepare learners for those that are likely to be most cognitively demanding |
| Teach learners to manage distractions | Distractions were present in workplace settings ([Weigl et al. 2015](#_ENREF_111); [Haji et al. 2016](#_ENREF_42); [Thomas et al. 2017](#_ENREF_104)) | - Teach learners that distractions are commonly present in HPE workplaces - Deconstruct with learners typical distractions in the workplace - Simulate distractions and teach skills that help learners manage distractions |
| Teach learners to monitor their level of CL and communicate feelings of cognitive overload | Learners may be able to recognize when they are cognitively overloaded ([Moos and Pitton 2014](#_ENREF_74)) | - Teach learners about CL and provide them language to communicate feelings of overload - Simulate or role-play learners telling their supervisor they feel cognitively overloaded - Provide faculty development so that teachers can respond to learners’ cognitive overload |
| Teach learners to use meta-cognitive techniques to enhance learning | Metacognition was not explicitly studied, but benefits are inferred by tenets of CLT | - Teach learners how to use metacognitive techniques such as self-explanation and monitoring and confirming understanding. |
